# Supplementary material
Source: PubMed Central journal article supplement (PMC2728979)
Supplement: 0901259106_ST1_PDF.pdf [file 0901259106_ST1_PDF.pdf]

**Table S1. List of proteins in the BAHD1 interactome**

| <b>BAHD1 nuclear partners found in this work yeast two-hybrid screen</b> |                                                               |                                                                                     |                                 |
|--------------------------------------------------------------------------|---------------------------------------------------------------|-------------------------------------------------------------------------------------|---------------------------------|
| <b>Name</b>                                                              | <b>Description</b>                                            | <b>Function</b>                                                                     | <b>Reference <sup>(a)</sup></b> |
| <b>Chromatin adapters</b>                                                |                                                               |                                                                                     |                                 |
| HP1 $\alpha$ (CBX5)                                                      | chromobox homolog 5 (HP1 alpha)                               | Binds histone H3 methylated on lysine 9 and chromatin-associated proteins           | (20-23)                         |
| HP1 $\beta$ (CBX1)                                                       | chromobox homolog 1 (HP1 beta)                                | Binds histone H3 methylated on lysine 9 and chromatin-associated proteins           |                                 |
| HP1 $\gamma$ (CBX3)                                                      | chromobox homolog 3 (HP1 gamma)                               | Binds histone H3 methylated on lysine 9 and chromatin-associated proteins           |                                 |
| MBD1                                                                     | methyl-CpG binding domain protein 1                           | Binds methylated CpG dinucleotide and chromatin-associated proteins                 | (22, 24-26)                     |
| <b>Chromatin modification enzymes</b>                                    |                                                               |                                                                                     |                                 |
| CHD1                                                                     | chromodomain helicase DNA binding protein 1                   | ATP-dependent chromatin remodeling activity                                         | (27-28)                         |
| HDAC5                                                                    | histone deacetylase 5                                         | Histone deacetylase activity                                                        | (23, 29, 30)                    |
| SETDB1 (ESET;KMT1E)                                                      | SET domain, bifurcated 1                                      | Histone-lysine N-methyltransferase activity                                         | (31-34)                         |
| <b>Transcription factors</b>                                             |                                                               |                                                                                     |                                 |
| GTF3C2                                                                   | general transcription factor IIIC, polypeptide 2, beta 110kDa | Required for RNA polymerase III-mediated transcription                              |                                 |
| HEYL (Hey3)                                                              | hairy/enhancer-of-split related with YRPW motif-like          | DNA-binding transcription factor with basic helix-loop-helix domain                 | (35)                            |
| KLF10 (TIEG1)                                                            | Kruppel-like factor 10                                        | DNA-binding transcription factor with C2H2 zinc finger domain                       | (36)                            |
| NR2F1 (COUP-TFI)                                                         | nuclear receptor subfamily 2, group F, member 1               | DNA-binding transcription factor with C4 type zinc finger domain (ligand-regulated) | (36)                            |
| PEG3                                                                     | paternally expressed 3                                        | DNA-binding transcription factor with C2H2 zinc finger domain                       |                                 |
| REQ (DPF2)                                                               | D4, zinc and double PHD fingers family 2                      | DNA-binding transcription factor with zinc and PHD fingers domain                   |                                 |
| VGL-3 (VGLL3)                                                            | vestigial like 3 (Drosophila)                                 | Transcription cofactor                                                              | (37)                            |
| ZBTB11                                                                   | zinc finger and BTB domain containing 11                      | DNA-binding transcription factor with C2H2 zinc finger domain                       |                                 |
| ZIM2                                                                     | Zinc finger, imprinted 2                                      | DNA-binding transcription factor with C2H2 zinc finger domain                       |                                 |
| ZNF121                                                                   | zinc finger protein 121                                       | DNA-binding transcription factor with C2H2 zinc finger domain                       |                                 |
| ZNF211                                                                   | zinc finger protein 211                                       | DNA-binding transcription factor with C2H2 zinc finger domain                       |                                 |
| ZNF331                                                                   | zinc finger protein 331                                       | DNA-binding transcription factor with C2H2 zinc finger domain                       |                                 |
| ZNF335                                                                   | zinc finger protein 335                                       | DNA-binding transcription factor with C2H2 zinc finger domain                       |                                 |
| ZNF354A                                                                  | zinc finger protein 354A                                      | DNA-binding transcription factor with C2H2 zinc finger domain                       |                                 |
| ZNF554                                                                   | zinc finger protein 554                                       | DNA-binding transcription factor with C2H2 zinc finger domain                       |                                 |
| <b>RNA processing factors</b>                                            |                                                               |                                                                                     |                                 |
| BCDIN3 (BIN3)                                                            | bicoid-interacting 3                                          | Methylphosphate capping protein present in a snRNP complex                          | (38)                            |
| DDX21 (Gu helicase)                                                      | DEAD (Asp-Glu-Ala-Asp) box polypeptide 21                     | RNA helicase activity                                                               | (39)                            |
| DDX27                                                                    | DEAD (Asp-Glu-Ala-Asp) box polypeptide 27                     | Putative RNA helicase activity                                                      | (35)                            |
| SFRS10                                                                   | Arginine/serine-rich splicing factor 10                       | RNA splicing factor                                                                 |                                 |
| SR-A1 (SCAF1)                                                            | SR-related CTD-associated factor 1                            | RNA splicing factor                                                                 |                                 |
| <b>Others</b>                                                            |                                                               |                                                                                     |                                 |
| FAF1                                                                     | Fas (TNFRSF6) associated factor 1                             | Fas-binding protein implicated in apoptosis                                         |                                 |
| KPNB2 ( TNPO1)                                                           | transportin 1                                                 | Importin                                                                            |                                 |
| RASSF1                                                                   | Ras association (RalGDS/AF-6) domain family member 1          | Negative regulator of cell proliferation                                            |                                 |
| WDR42A                                                                   | WD repeat domain 42A                                          | Unknown                                                                             |                                 |

**BAHD1 nuclear partners found in reference (11)<sup>(a)</sup>**

|                         |                                    |                                         |         |
|-------------------------|------------------------------------|-----------------------------------------|---------|
| KHDRBS3 (T-STAR, SLM-2) | Sam68-like phosphotyrosine protein | RNA binding protein                     | (11,40) |
| DVL3                    | dishevelled, dsh homolog 3         | Involved in Wnt signaling               | (11)    |
| MDF1                    | MyoD family inhibitor              | Inhibits myogenic transcription factors | (11)    |

**BAHD1 indirect partners from Ingenuity and HRPD databases**

| Name <sup>(a)</sup>                  | Description                                           | Function                                                            | Reference <sup>(a)</sup> |
|--------------------------------------|-------------------------------------------------------|---------------------------------------------------------------------|--------------------------|
| <b>Chromatin-associated factor</b>   |                                                       |                                                                     |                          |
| ATF7IP (MCAF1)                       | Activating transcription factor 7 interacting protein | Transcription co-repressor                                          | (26,33)                  |
| <b>Chromatin modification enzyme</b> |                                                       |                                                                     |                          |
| DNMT3                                | DNA (cytosine-5-)-methyltransferase 3                 | DNA methyltransferase (cytosine-specific) activity                  | (32, 41-43)              |
| EZH2                                 | Enhancer of zeste homolog 2                           | Histone-lysine N-methyltransferase activity of the PRC2 complex     | (44)                     |
| RING1b (RNF2)                        | Ring finger protein 2                                 | Ubiquitin protein ligase of the PRC1 complex                        | (45,46)                  |
| <b>Transcription factors</b>         |                                                       |                                                                     |                          |
| AP2 $\alpha$                         | Transcription factor AP-2 alpha                       | DNA-binding transcription factor with C2H2 zinc finger domain       | (47,51)                  |
| EGR1 (ZNF225)                        | Early growth response 1                               | DNA-binding transcription factor with C2H2 zinc finger domain       | (47)                     |
| HAND1 (Thing1)                       | heart and neural crest derivatives expressed 1        | DNA-binding transcription factor with basic helix-loop-helix domain | (11,48)                  |
| MEF2                                 | myocyte enhancer factor 2                             | DNA-binding transcription factor                                    | (23,29,37,49,50)         |
| NCOR1                                | nuclear receptor co-repressor 1                       | DNA-binding transcription factor                                    | (27,30)                  |
| SP1                                  | Sp1 transcription factor                              | DNA-binding transcription factor with C2H2 zinc finger domain       | (26,36,47,51,52)         |
| TEF-1 (TEAD1)                        | Transcriptional enhancer factor 1                     | DNA-binding transcription factor                                    | (50,52)                  |
| ZNF512B                              | zinc finger protein 512B                              | DNA-binding transcription factor with C2H2 zinc finger domain       | (35)                     |

(a) References are in Supporting information and provide support for interactions in Fig. S5
