# Supplementary material
Source: PubMed Central journal article supplement (PMC2728979)
Supplement: 0901259106_ST2_PDF.pdf [file 0901259106_ST2_PDF.pdf]

**Table S2. Transcripts modified in BAHD1 knockdown HEK293 cells**

| Probe set                  | Gene Title                                                              | Gene Symbol | Fold change | Adjacent p-Value | Chromosomal Location      | AccNum    | Gene ID |
|----------------------------|-------------------------------------------------------------------------|-------------|-------------|------------------|---------------------------|-----------|---------|
| <b>Induced transcripts</b> |                                                                         |             |             |                  |                           |           |         |
| 202409_at                  | insulin-like growth factor 2 (somatomedin A)                            | IGF2        | 2,27        | 4,51799E-06      | chr11p15.5                | X07868    | 3481    |
| 266_s_at                   | CD24 molecule                                                           | CD24        | 2,14        | 3,5543E-06       | chr6q21                   | L33930    | 934     |
| 209763_at                  | chordin-like 1                                                          | CHRD1       | 2,12        | 0,000101708      | chrXq22.3                 | AL049176  | 91851   |
| 223500_at                  | complexin 1                                                             | CPLX1       | 2,04        | 2,26786E-06      | chr4p16.3                 | BC002471  | 10815   |
| 229485_x_at                | hypothetical protein BC012029                                           | LOC152573   | 2,03        | 1,30654E-10      | chr4p13                   | A1735586  | 152573  |
| 227705_at                  | transcription elongation factor A (SII)-like 7                          | TCEAL7      | 2,02        | 0,000341203      | chrXq22.1                 | BF591534  | 56849   |
| 1559072_a_at               | leucine rich repeat containing 62                                       | LRRC62      | 2,00        | 0,000454616      | chr22q13.1                | BC032083  | 114794  |
| 232231_a_at                | runt-related transcription factor 2                                     | RUNX2       | 1,96        | 0,000187825      | chr6p21                   | AL353944  | 860     |
| 236359_at                  | sodium channel, voltage-gated, type IV, beta                            | SCN4B       | 1,94        | 0,02642903       | chr11q23.3                | AW026241  | 6330    |
| 234016_at                  | hypothetical protein LOC90499                                           | ANKRD20B    | 1,90        | 0,008971144      | chr18p11.21 /// chr2q11.1 | AL137712  | 90499   |
| 230316_at                  | SEC14-like 2 (S. cerevisiae)                                            | SEC14L2     | 1,83        | 9,84188E-07      | chr22q12.2                | R49343    | 200312  |
| 1554549_a_at               | WD repeat domain 20                                                     | WDR20       | 1,83        | 0,000832047      | chr14q32.31               | BC030654  | 91833   |
| 204120_s_at                | adenosine kinase                                                        | ADK         | 1,82        | 2,18165E-09      | chr10q22 10q11-q24        | NM_001123 | 132     |
| 228463_at                  | forkhead box A3                                                         | FOXA3       | 1,82        | 0,02816691       | chr19q13.2-q13.4          | R99562    | 3171    |
| 226675_s_at                | metastasis associated lung adenocarcinoma transcript 1                  | MALAT1      | 1,81        | 1,16475E-09      | chr11q13.1                | W80468    | 378938  |
| 203989_x_at                | coagulation factor II (thrombin) receptor                               | F2R         | 1,78        | 6,40732E-09      | chr5q13                   | NM_001992 | 2149    |
| 204446_s_at                | arachidonate 5-lipoxygenase                                             | ALOX5       | 1,76        | 0,005604599      | chr10q11.2                | NM_000698 | 240     |
| 208949_s_at                | lectin, galactoside-binding, soluble, 3                                 | LGALS3      | 1,76        | 0,04348753       | chr14q21-q22              | BC001120  | 3958    |
| 209981_at                  | cold shock domain containing C2, RNA binding                            | CSDC2       | 1,75        | 0,000946192      | chr22q13.2-q13.31         | AL023553  | 27351   |
| 211668_s_at                | plasminogen activator, urokinase                                        | PLAU        | 1,74        | 0,00076113       | chr10q24                  | K03226    | 5328    |
| 212417_at                  | secretory carrier membrane protein 1                                    | SCAMP1      | 1,74        | 2,52636E-11      | chr5q13.3-q14.1           | BF058944  | 9522    |
| 214414_x_at                | hemoglobin, alpha 1                                                     | HBA1        | 1,73        | 0,009947431      | chr16p13.3                | T50399    | 3039    |
| 211421_s_at                | ret proto-oncogene                                                      | RET         | 1,72        | 0,03524844       | chr10q11.2                | M31213    | 5979    |
| 218254_s_at                | SAR1 gene homolog B (S. cerevisiae)                                     | SAR1B       | 1,71        | 1,70874E-11      | chr5q31.1                 | NM_016103 | 51128   |
| 242385_at                  | RAR-related orphan receptor B                                           | RORB        | 1,71        | 0,02944577       | chr9q22                   | R18374    | 6096    |
| 213479_at                  | neuronal pentraxin II                                                   | NPTX2       | 1,71        | 1,02019E-05      | chr7q21.3-q22.1           | U26662    | 4885    |
| 219347_at                  | nudix (nucleoside diphosphate linked moiety X)-type motif 15            | NUDT15      | 1,70        | 4,59076E-11      | chr13q14.2                | NM_018283 | 55270   |
| 214314_s_at                | eukaryotic translation initiation factor 5B                             | EIF5B       | 1,70        | 2,03416E-08      | chr2q11.2                 | BE138647  | 9669    |
| 228176_at                  | endothelial differentiation, sphingolipid G-protein-coupled receptor, 3 | EDG3        | 1,69        | 0,00613117       | chr9q22.1-q22.2           | AA534817  | 286223  |
| 221276_s_at                | syncollin, intermediate filament 1                                      | SYNC1       | 1,69        | 0,000263696      | chr1p34.3-p33             | NM_030786 | 81493   |
| 238622_at                  | RAP2B, member of RAS oncogene family                                    | RAP2B       | 1,67        | 0,001645201      | chr3q25.2                 | AW269686  | 5912    |
| 205619_s_at                | mesenchyme homeobox 1                                                   | MEOX1       | 1,67        | 3,25444E-06      | chr17q21                  | NM_004527 | 4222    |
| 223651_x_at                | cell division cycle 23 homolog (S. cerevisiae)                          | CDC23       | 1,66        | 0,000326867      | chr5q31                   | BC005258  | 8697    |
| 225497_at                  | arginyltransferase 1                                                    | ATE1        | 1,66        | 1,1343E-09       | chr10q26.13               | AL589591  | 11101   |
| 226690_at                  | Adenylate cyclase activating polypeptide 1 (pituitary) receptor type I  | ADCYAP1R1   | 1,65        | 0,003771459      | chr7p14                   | AW451961  | 117     |
| 200821_at                  | lysosomal-associated membrane protein 2                                 | LAMP2       | 1,65        | 3,82943E-12      | chrXq24                   | NM_013995 | 3920    |
| 227899_at                  | vitrin                                                                  | VIT         | 1,64        | 1,53166E-07      | chr2p22-p21               | AI817458  | 5212    |
| 214068_at                  | brain expressed, associated with Nedd4                                  | BEAN        | 1,64        | 0,001883455      | chr16q21                  | AF070610  | 146227  |
| 229254_at                  | major facilitator superfamily domain containing 4                       | MFSD4       | 1,63        | 0,02623782       | chr1q32.1                 | BE550027  | 148808  |

|              |                                                        |           |      |             |                                                                                                                                                                                                                                                                                           |           |        |
|--------------|--------------------------------------------------------|-----------|------|-------------|-------------------------------------------------------------------------------------------------------------------------------------------------------------------------------------------------------------------------------------------------------------------------------------------|-----------|--------|
| 227856_at    | chromosome 4 open reading frame 32                     | C4orf32   | 1,63 | 1,37246E-08 | chr4q25                                                                                                                                                                                                                                                                                   | AI110850  | 132720 |
| 204807_at    | transmembrane protein 5                                | TMEM5     | 1,63 | 4,41098E-07 | chr12q14.2                                                                                                                                                                                                                                                                                | BF224146  | 10329  |
| 223843_at    | scavenger receptor class A, member 3                   | SCARA3    | 1,63 | 0,004107223 | chr8p21                                                                                                                                                                                                                                                                                   | AB007830  | 51435  |
| 225079_at    | epithelial membrane protein 2                          | EMP2      | 1,63 | 0,000397831 | chr16p13.2                                                                                                                                                                                                                                                                                | AI089325  | 2013   |
| 1556015_a_at | mesoderm posterior 2 homolog (mouse)                   | MESP2     | 1,62 | 0,00850892  | chr15q26.1                                                                                                                                                                                                                                                                                | AL360139  | 145873 |
| 236533_at    | development and differentiation enhancing factor 1     | DDEF1     | 1,62 | 0,002914433 | chr8q24.1-q24.2                                                                                                                                                                                                                                                                           | AW236958  | 50807  |
| 228568_at    | GRINL1A combined protein                               | Gcom1     | 1,62 | 0,01102865  | chr15q21.3                                                                                                                                                                                                                                                                                | AI926697  | 145781 |
| 216860_s_at  | growth differentiation factor 11                       | GDF11     | 1,62 | 3,24479E-07 | chr12q13.2                                                                                                                                                                                                                                                                                | AF028333  | 10220  |
| 223821_s_at  | sushi domain containing 4                              | SUSD4     | 1,62 | 0,000887802 | chr1q41                                                                                                                                                                                                                                                                                   | BC004888  | 55061  |
| 204040_at    | ring finger protein 144A                               | RNF144A   | 1,61 | 0,006895418 | chr2p25.2-p25.1                                                                                                                                                                                                                                                                           | NM_014746 | 9781   |
| 228715_at    | zinc finger, CCHC domain containing 12                 | ZCCHC12   | 1,61 | 4,25922E-08 | chrXq24                                                                                                                                                                                                                                                                                   | AV725825  | 170261 |
| 239913_at    | solute carrier family 10, member 4                     | SLC10A4   | 1,61 | 0,00237624  | chr4p12                                                                                                                                                                                                                                                                                   | AI421796  | 201780 |
| 206850_at    | RAS-like, family 10, member A                          | RASL10A   | 1,60 | 0,03197565  | chr22q12.2                                                                                                                                                                                                                                                                                | NM_006477 | 10633  |
| 1554069_at   | EPH receptor A8                                        | EPHA8     | 1,60 | 0,00423041  | chr1p36.12                                                                                                                                                                                                                                                                                | BC038796  | 2046   |
| 201427_s_at  | selenoprotein P, plasma, 1                             | SEPP1     | 1,60 | 1,61211E-10 | chr5q31                                                                                                                                                                                                                                                                                   | NM_005410 | 6414   |
| 219520_s_at  | WWC family member 3                                    | WWC3      | 1,60 | 0,00552501  | chrXp22.32                                                                                                                                                                                                                                                                                | NM_018458 | 55841  |
| 209574_s_at  | chromosome 18 open reading frame 1                     | C18orf1   | 1,60 | 0,004157257 | chr18p11.2                                                                                                                                                                                                                                                                                | AI349506  | 753    |
| 202007_at    | nidogen 1                                              | NID1      | 1,60 | 1,26352E-09 | chr1q43                                                                                                                                                                                                                                                                                   | BF940043  | 4811   |
| 203455_s_at  | spermidine/spermine N1-acetyltransferase 1             | SAT1      | 1,60 | 2,07338E-08 | chrXp22.1                                                                                                                                                                                                                                                                                 | NM_002970 | 6303   |
| 226548_at    | SH3-binding domain kinase 1                            | SBK1      | 1,59 | 0,001169908 | chr16p11.2                                                                                                                                                                                                                                                                                | AI935915  | 112868 |
| 226913_s_at  | SRY (sex determining region Y)-box 8                   | SOX8      | 1,58 | 0,01833992  | chr16p13.3                                                                                                                                                                                                                                                                                | BF527050  | 30812  |
| 202422_s_at  | acyl-CoA synthetase long-chain family member 4         | ACSL4     | 1,58 | 0,003567397 | chrXq22.3-q23                                                                                                                                                                                                                                                                             | NM_022977 | 2182   |
| 233329_s_at  | lysine-rich coiled-coil 1                              | KRCC1     | 1,57 | 2,10235E-06 | chr2p11.2                                                                                                                                                                                                                                                                                 | AK025986  | 51315  |
| 203485_at    | reticulon 1                                            | RTN1      | 1,57 | 0,0272523   | chr14q23.1                                                                                                                                                                                                                                                                                | NM_021136 | 6252   |
| 225516_at    | solute carrier family 7, member 2                      | SLC7A2    | 1,57 | 5,77419E-07 | chr8p22-p21.3                                                                                                                                                                                                                                                                             | AA876372  | 6542   |
| 225802_at    | topoisomerase (DNA) I, mitochondrial                   | TOP1MT    | 1,57 | 5,17971E-05 | chr8q24.3                                                                                                                                                                                                                                                                                 | AW592604  | 116447 |
| 229849_at    | WAS/WASL interacting protein family, member 3          | WIPF3     | 1,57 | 0,000685469 | chr7p15.1                                                                                                                                                                                                                                                                                 | AI807950  | NA     |
| 235057_at    | itchy homolog E3 ubiquitin protein ligase (mouse)      | ITCH      | 1,57 | 0,003713306 | chr20q11.22-q11.23                                                                                                                                                                                                                                                                        | AW089307  | 83737  |
| 216497_at    | heterogeneous nuclear ribonucleoprotein A1             | HNRNPA1   | 1,57 | 0,04783598  | chr10q11.22 /// chr11p15.4<br>/// chr11q23.1 ///<br>chr12q13.1 /// chr12q22 ///<br>chr13q12.11 /// chr13q14.3<br>/// chr19p13.2 ///<br>chr19q13.2 /// chr1p13.1 ///<br>chr1q32.1 /// chr2q31.1 ///<br>chr2q32.3 /// chr2q33.1 ///<br>chr2q33.3 /// chr3p22.1 ///<br>chr3q24 /// chr4q21.1 | AL390738  | 219409 |
| 244264_at    | killer cell lectin-like receptor subfamily G, member 2 | KLRG2     | 1,57 | 0,02274599  | chr7q34                                                                                                                                                                                                                                                                                   | AW197495  | 346689 |
| 227813_at    | THAP domain containing 6                               | THAP6     | 1,56 | 0,006343741 | chr4q21.1                                                                                                                                                                                                                                                                                 | AW058657  | 152815 |
| 229850_at    | follicular lymphoma variant translocation 1            | FVT1      | 1,56 | 4,51799E-06 | chr18q21.3                                                                                                                                                                                                                                                                                | N30152    | NA     |
| 219858_s_at  | FLJ20160 protein                                       | FLJ20160  | 1,56 | 0,02872208  | chr2q32.2                                                                                                                                                                                                                                                                                 | NM_017694 | 54842  |
| 210138_at    | regulator of G-protein signaling 20                    | RGS20     | 1,56 | 0,02761309  | chr8q12.1                                                                                                                                                                                                                                                                                 | AF074979  | 8601   |
| 235170_at    | zinc finger protein 92                                 | ZNF92     | 1,56 | 6,57701E-09 | chr7q11.21                                                                                                                                                                                                                                                                                | T52999    | 168374 |
| 211343_s_at  | collagen, type XIII, alpha 1                           | COL13A1   | 1,55 | 0,00011693  | chr10q22                                                                                                                                                                                                                                                                                  | M33653    | 1305   |
| 1552439_s_at | multiple EGF-like-domains 11                           | MEGF11    | 1,55 | 0,009395786 | chr15q22.31                                                                                                                                                                                                                                                                               | NM_032445 | 84465  |
| 207156_at    | histone cluster 1, H2ag                                | HIST1H2AG | 1,55 | 3,55575E-05 | chr6p22.1                                                                                                                                                                                                                                                                                 | NM_021064 | 8969   |
| 1554542_at   | similar to CG4995 gene product                         | LOC153328 | 1,55 | 0,03914669  | chr5q31.1                                                                                                                                                                                                                                                                                 | BC025747  | 153328 |
| 209451_at    | TRAF family member-associated NFKB activator           | TANK      | 1,55 | 3,10698E-06 | chr2q24-q31                                                                                                                                                                                                                                                                               | U59863    | 10010  |

|             |                                                              |              |      |             |                           |           |        |
|-------------|--------------------------------------------------------------|--------------|------|-------------|---------------------------|-----------|--------|
| 205191_at   | retinitis pigmentosa 2 (X-linked recessive)                  | RP2          | 1,55 | 0,005480873 | chrXp11.4-p11.21          | NM_006915 | 6102   |
| 206315_at   | cytokine receptor-like factor 1                              | CRLF1        | 1,54 | 0,01602843  | chr19p12                  | NM_004750 | 9244   |
| 201839_s_at | tumor-associated calcium signal transducer 1                 | TACSTD1      | 1,54 | 0,01347745  | chr2p21                   | NM_002354 | 4072   |
| 224712_x_at | chromosome 19 open reading frame 42                          | C19orf42     | 1,54 | 0,01817747  | chr19p13.11               | AI656658  | 79086  |
| 205286_at   | transcription factor AP-2 gamma                              | TFAP2C       | 1,54 | 0,000129548 | chr20q13.2                | U85658    | 7022   |
| 210175_at   | chromosome 2 open reading frame 3                            | C2orf3       | 1,54 | 5,20923E-06 | chr2p11.2-p11.1           | BC000853  | 6936   |
| 204755_x_at | hepatic leukemia factor                                      | HLF          | 1,54 | 0,00423041  | chr17q22                  | M95585    | 3131   |
| 228924_s_at | Ubiquitin-conjugating enzyme E2, J1 (UBC6 homolog, yeast)    | UBE2J1       | 1,54 | 0,01710196  | chr6q15                   | AA491236  | 51465  |
| 202391_at   | brain abundant, membrane attached signal protein 1           | BASP1        | 1,53 | 2,48507E-07 | chr5p15.1-p14             | NM_006317 | 10409  |
| 228454_at   | ligand dependent nuclear receptor corepressor                | LCOR         | 1,53 | 7,86371E-08 | chr10q24                  | AW663968  | 84458  |
| 210380_s_at | calcium channel, voltage-dependent, T type, alpha 1G subunit | CACNA1G      | 1,53 | 0,0302633   | chr17q22                  | AF126966  | 8913   |
| 223288_at   | ubiquitin specific peptidase 38                              | USP38        | 1,53 | 4,25922E-08 | ---                       | AW977401  | 84640  |
| 215073_s_at | nuclear receptor subfamily 2, group F, member 2              | NR2F2        | 1,53 | 1,85315E-07 | chr15q26                  | AL554245  | 7026   |
| 222751_at   | HERPUD family member 2                                       | HERPUD2      | 1,53 | 1,06328E-06 | chr7p14.2                 | AA536012  | 64224  |
| 205113_at   | neurofilament, medium polypeptide 150kDa                     | NEFM         | 1,52 | 1,70335E-05 | chr8p21                   | NM_005382 | 4741   |
| 228754_at   | solute carrier family 6, member 6                            | SLC6A6       | 1,51 | 0,03543398  | chr3p25-p24               | BG150485  | 80852  |
| 202158_s_at | CUG triplet repeat, RNA binding protein 2                    | CUGBP2       | 1,51 | 0,000920671 | chr10p13                  | NM_006561 | 10659  |
| 218900_at   | cyclin M4                                                    | CNNM4        | 1,51 | 0,01531443  | chr2p12-p11.2             | NM_020184 | 26504  |
| 218871_x_at | chondroitin sulfate GalNAcT-2                                | GALNACT-2    | 1,51 | 8,54455E-07 | chr10q11.21               | NM_018590 | 55454  |
| 203845_at   | p300/CBP-associated factor                                   | PCAF         | 1,51 | 0,000476079 | chr3p24                   | AV727449  | 8850   |
| 209786_at   | high mobility group nucleosomal binding domain 4             | HMGN4        | 1,51 | 4,50036E-07 | chr6p21.3                 | BC001282  | 10473  |
| 230001_at   | membrane-associated ring finger (C3HC4) 9                    | 9-Mar        | 1,50 | 0,04701235  | chr12q14.1                | AI807693  | 92979  |
| 1554314_at  | chromosome 6 open reading frame 141                          | C6orf141     | 1,50 | 0,03838336  | chr6p12.3                 | BC036917  | 135398 |
| 214240_at   | galanin                                                      | GAL          | 1,50 | 0,000128676 | chr11q13.2                | AL556409  | 51083  |
| 204447_at   | ProSAPIP1 protein                                            | ProSAPIP1    | 1,50 | 3,59401E-06 | chr20p13                  | NM_014731 | 9762   |
| 222103_at   | activating transcription factor 1                            | ATF1         | 1,50 | 4,9498E-09  | chr12q13                  | AI434345  | 466    |
| 224772_at   | neuron navigator 1                                           | NAV1         | 1,50 | 0,01536971  | ---                       | AB032977  | 89796  |
| 231567_s_at | coiled-coil domain containing 62                             | CCDC62       | 1,49 | 0,04739882  | chr12q24.31               | AI027946  | 84660  |
| 242517_at   | KISS1 receptor                                               | KISS1R       | 1,49 | 0,00337594  | chr19p13.3                | AI819198  | 84634  |
| 218424_s_at | STEAP family member 3                                        | STEAP3       | 1,48 | 0,01501934  | chr2q14.2                 | NM_018234 | 55240  |
| 203066_at   | B cell RAG associated protein                                | GALNAC4S-6ST | 1,48 | 0,000365149 | chr10q26                  | NM_014863 | 51363  |
| 201163_s_at | insulin-like growth factor binding protein 7                 | IGFBP7       | 1,48 | 2,01261E-05 | chr4q12                   | NM_001553 | 3490   |
| 209544_at   | receptor-interacting serine-threonine kinase 2               | RIPK2        | 1,48 | 0,01738217  | chr8q21                   | AF027706  | 8767   |
| 201304_at   | NADH dehydrogenase (ubiquinone) 1 alpha subcomplex, 5, 13kDa | NDUFA5       | 1,48 | 2,82476E-07 | chr7q32                   | NM_005000 | 4698   |
| 243463_s_at | Ras-like without CAAX 1                                      | RIT1         | 1,48 | 0,000237432 | chr1q22                   | AA417878  | NA     |
| 228802_at   | RNA binding protein with multiple splicing 2                 | RBPMS2       | 1,48 | 0,01574586  | chr15q22.31               | BE348466  | 348093 |
| 225022_at   | golgi associated PDZ and coiled-coil motif containing        | GOPC         | 1,48 | 0,001774715 | chr6q21                   | AW271409  | 57120  |
| 201915_at   | SEC63 homolog (S. cerevisiae)                                | SEC63        | 1,48 | 0,01079859  | chr6q21                   | AI806665  | 11231  |
| 200606_at   | desmoplakin                                                  | DSP          | 1,48 | 1,58258E-07 | chr6p24                   | NM_004415 | 1832   |
| 226430_at   | RELT-like 1                                                  | RELT1        | 1,47 | 5,65572E-08 | ---                       | AI394438  | 253981 |
| 209575_at   | interleukin 10 receptor, beta                                | IL10RB       | 1,47 | 0,00062672  | chr21q22.1-q22.2 21q22.11 | BC001903  | 3588   |
| 209803_s_at | pleckstrin homology-like domain, family A, member 2          | PHLDA2       | 1,47 | 4,74729E-06 | chr11p15.5                | AF001294  | 7262   |
| 205296_at   | retinoblastoma-like 1 (p107)                                 | RBL1         | 1,47 | 0,002664397 | chr20q11.2                | AL365505  | 5933   |
| 210681_s_at | ubiquitin specific peptidase 15                              | USP15        | 1,47 | 9,57446E-05 | chr12q14                  | AF153604  | 9958   |

|              |                                                                      |                  |      |             |                                                 |           |        |
|--------------|----------------------------------------------------------------------|------------------|------|-------------|-------------------------------------------------|-----------|--------|
| 227015_at    | aspartate beta-hydroxylase domain containing 2                       | ASPHD2           | 1,47 | 0,03140279  | chr22q12.1                                      | Z99714    | 24144  |
| 201963_at    | acyl-CoA synthetase long-chain family member 1                       | ACSL1            | 1,47 | 0,00176519  | chr4q34-q35                                     | NM_021122 | 2180   |
| 215071_s_at  | histone cluster 1, H2ac                                              | HIST1H2AC        | 1,47 | 8,57423E-05 | chr6p21.3                                       | AL353759  | 3008   |
| 1553479_at   | transmembrane protein 145                                            | TMEM145          | 1,47 | 0,03063325  | chr19q13.2                                      | NM_173633 | 284339 |
| 222765_x_at  | ESF1, nucleolar pre-rRNA processing protein, homolog (S. cerevisiae) | ESF1             | 1,46 | 0,0367495   | chr20p12.1                                      | AL161659  | 79133  |
| 1564207_at   | hypothetical protein FLJ35390                                        | FLJ35390         | 1,46 | 0,002384459 | chr7p13                                         | BC014556  | 255031 |
| 201020_at    | tyrosine 3-monooxygenase                                             | YWHAH            | 1,46 | 1,19248E-06 | chr22q12.3                                      | NM_003405 | 7533   |
| 217144_at    | ubiquitin B /// similar to ubiquitin B precursor                     | UBB              | 1,46 | 0,0026089   | chr17p12-p11.2                                  | X04801    | 7315   |
| 222459_at    | chromosome 1 open reading frame 108                                  | C1orf108         | 1,46 | 9,34549E-06 | chr1p34.3                                       | BG109865  | 79647  |
| 226333_at    | interleukin 6 receptor                                               | IL6R             | 1,46 | 0,005022682 | chr1q21                                         | AV700030  | 3570   |
| 1558014_s_at | male sterility domain containing 2                                   | MLSTD2           | 1,46 | 1,1146E-06  | chr11p15.2                                      | BG261090  | 84188  |
| 238199_x_at  | OK/SW-cl.16                                                          | LOC440552        | 1,46 | 0,000732094 | chr1p36.33                                      | AI708524  | 440552 |
| 1553096_s_at | BCL2-like 11 (apoptosis facilitator)                                 | BCL2L11          | 1,46 | 0,004705645 | chr2q13                                         | NM_138627 | 10018  |
| 212449_s_at  | lysophospholipase I                                                  | LYPLA1           | 1,46 | 2,83778E-08 | chr8q11.23                                      | BG288007  | 10434  |
| 205194_at    | phosphoserine phosphatase                                            | PSPH             | 1,46 | 1,76188E-06 | chr7p15.2-p15.1                                 | NM_004577 | 5723   |
| 231579_s_at  | TIMP metalloproteinase inhibitor 2                                   | TIMP2            | 1,46 | 0,00011254  | chr17q25                                        | BE968786  | 7077   |
| 211709_s_at  | C-type lectin domain family 11, member A                             | CLEC11A          | 1,46 | 0,00497526  | chr19q13.3                                      | BC005810  | 6320   |
| 200603_at    | protein kinase, cAMP-dependent                                       | PRKAR1A          | 1,46 | 2,10194E-06 | chr17q23-q24                                    | AL050038  | 5573   |
| 201951_at    | activated leukocyte cell adhesion molecule                           | ALCAM            | 1,46 | 0,005738057 | chr3q13.1                                       | BF242905  | 214    |
| 212262_at    | quaking homolog, KH domain RNA binding (mouse)                       | QKI              | 1,45 | 6,20387E-05 | chr6q26-q27                                     | AA149639  | 9444   |
| 244467_at    | transmembrane protein 46-like                                        | C22:CTA-250D10.9 | 1,45 | 0,01771496  | chr22q13.2                                      | AW136354  | 440829 |
| 210029_at    | indoleamine-pyrrole 2,3 dioxygenase                                  | INDO             | 1,45 | 0,002339924 | chr8p12-p11                                     | M34455    | 3620   |
| 208762_at    | SMT3 suppressor of mif two 3 homolog 1 (S. cerevisiae)               | SUMO1            | 1,45 | 1,23834E-05 | chr2q33                                         | U83117    | 7341   |
| 205583_s_at  | chromosome X open reading frame 45                                   | CXorf45          | 1,45 | 7,53772E-08 | chrXq23                                         | NM_024810 | 79868  |
| 242136_x_at  | Hypothetical LOC403340                                               | MGC70870         | 1,45 | 0,04866097  | ---                                             | T66145    | 403340 |
| 206214_at    | phospholipase A2, group VII                                          | PLA2G7           | 1,45 | 0,01789758  | chr6p21.2-p12                                   | NM_005084 | 7941   |
| 222637_at    | COMM domain containing 10                                            | COMM10           | 1,45 | 7,30089E-05 | chr5q23.1                                       | BC005179  | 51397  |
| 224786_at    | short coiled-coil protein                                            | SCOC             | 1,45 | 5,93781E-11 | chr4q31.1                                       | AL133580  | 60592  |
| 219669_at    | CD177 molecule                                                       | CD177            | 1,45 | 4,12384E-05 | chr19q13.2                                      | NM_020406 | 57126  |
| 234971_x_at  | phospholipase C, delta 3                                             | PLCD3            | 1,45 | 0,009070529 | chr17q21.31                                     | AI521584  | 113026 |
| 220958_at    | unc-51-like kinase 4 (C. elegans)                                    | ULK4             | 1,45 | 0,000925599 | chr3p22.1                                       | NM_017886 | 54986  |
| 217127_at    | cystathionase (cystathionine gamma-lyase)                            | CTH              | 1,44 | 6,98108E-08 | chr1p31.1                                       | AL354872  | 1491   |
| 202289_s_at  | transforming, acidic coiled-coil containing protein 2                | TACC2            | 1,44 | 0,04644117  | chr10q26                                        | NM_006997 | 10579  |
| 225448_at    | N-ethylmaleimide-sensitive factor attachment protein, gamma          | NAPG             | 1,44 | 0,02702152  | chr18p11.22                                     | AL519376  | 8774   |
| 229804_x_at  | COBW domain containing 1                                             | CBWD1            | 1,44 | 0,02111859  | chr2q14.1 /// chr9p24.3 /// chr9q12 /// chr9q13 | AW169333  | 55871  |
| 205774_at    | coagulation factor XII (Hageman factor)                              | F12              | 1,44 | 0,000204244 | chr5q33-qter                                    | NM_000505 | 2161   |
| 213245_at    | adenylate cyclase 1 (brain)                                          | ADCY1            | 1,44 | 0,03115297  | chr7p13-p12                                     | AL120173  | 107    |
| 219301_s_at  | contactin associated protein-like 2                                  | CNTNAP2          | 1,43 | 1,05752E-05 | chr7q35-q36                                     | AU144598  | 26047  |
| 209569_x_at  | DNA segment on chromosome 4 (unique) 234 expressed sequence          | D4S234E          | 1,43 | 0,01848932  | chr4p16.3                                       | NM_014392 | 27065  |
| 201505_at    | laminin, beta 1                                                      | LAMB1            | 1,43 | 2,15974E-05 | chr7q22                                         | NM_002291 | 3912   |
| 241734_at    | serum response factor binding protein 1                              | SRFBP1           | 1,43 | 0,007025972 | chr5q23.1                                       | AI391443  | 153443 |
| 219157_at    | kelch-like 2, Mayven (Drosophila)                                    | KLHL2            | 1,43 | 0,002082349 | chr4q21.2                                       | NM_007246 | 11275  |
| 226628_at    | THO complex 2                                                        | THOC2            | 1,43 | 0,007613273 | chrXq25-q26.3                                   | BG259856  | 57187  |
| 203840_at    | basic leucine zipper nuclear factor 1 (JEM-1)                        | BLZF1            | 1,43 | 0,01371854  | chr1q24                                         | NM_003666 | 8548   |

|              |                                                                     |           |      |             |                 |           |        |
|--------------|---------------------------------------------------------------------|-----------|------|-------------|-----------------|-----------|--------|
| 213348_at    | cyclin-dependent kinase inhibitor 1C (p57, Kip2)                    | CDKN1C    | 1,43 | 0,003104109 | chr11p15.5      | N33167    | 1028   |
| 205531_s_at  | glutaminase 2 (liver, mitochondrial)                                | GLS2      | 1,43 | 0,04185452  | chr12q13        | NM_013267 | 27165  |
| 212440_at    | putative nucleic acid binding protein RY-1                          | RY1       | 1,43 | 1,48015E-06 | chr2p14         | X76302    | 11017  |
| 206552_s_at  | tachykinin, precursor 1                                             | TAC1      | 1,43 | 0,03058159  | chr7q21-q22     | NM_003182 | 6863   |
| 230056_at    | bromodomain PHD finger transcription factor                         | BPTF      | 1,43 | 0,002872774 | chr17q24.3      | AI735696  | 2186   |
| 225431_x_at  | aminoacylase 1-like 2                                               | ACY1L2    | 1,42 | 1,39484E-09 | chr6q15         | BE779764  | 135293 |
| 223551_at    | protein kinase (cAMP-dependent, catalytic) inhibitor beta           | PKIB      | 1,42 | 0,003632432 | chr6q22.31      | AF225513  | 5570   |
| 1555824_a_at | phosphofurin acidic cluster sorting protein 2                       | PACS2     | 1,42 | 0,00720534  | chr14q32.33     | AK098354  | NA     |
| 222490_at    | polymerase (RNA) III (DNA directed) polypeptide E (80kD)            | POLR3E    | 1,42 | 2,26539E-06 | chr16p12.1      | AK023160  | 55718  |
| 204619_s_at  | versican                                                            | VCAN      | 1,42 | 0,00028905  | chr5q14.3       | BF590263  | 1462   |
| 216806_at    | similar to laminin receptor 1 (ribosomal protein SA)                | LOC652411 | 1,42 | 0,000121504 | ---             | AL136306  | NA     |
| 212637_s_at  | WW domain containing E3 ubiquitin protein ligase 1                  | WWP1      | 1,42 | 0,0228142   | chr8q21         | AU155187  | 11059  |
| 224649_x_at  | cyclin Y                                                            | CCNY      | 1,42 | 7,11554E-06 | chr10p11.21     | AI765014  | 219771 |
| 1557132_at   | WD repeat domain 17                                                 | WDR17     | 1,42 | 0,01711633  | chr4q34         | BI713506  | 116966 |
| 228915_at    | dachshund homolog 1 (Drosophila)                                    | DACH1     | 1,42 | 0,005604599 | chr13q22        | AI650353  | 1602   |
| 226686_at    | CDGSH iron sulfur domain 2                                          | CISD2     | 1,41 | 0,000243655 | chr4q24         | AI188518  | 493856 |
| 233970_s_at  | tRNA methyltransferase 6 homolog (S. cerevisiae)                    | TRMT6     | 1,41 | 7,42846E-05 | chr20p12.3      | AB032979  | 51605  |
| 217996_at    | pleckstrin homology-like domain, family A, member 1                 | PHLDA1    | 1,41 | 0,009062491 | chr12q15        | AA576961  | 22822  |
| 219895_at    | family with sequence similarity 70, member A                        | FAM70A    | 1,41 | 0,01950408  | chrXq24         | NM_017938 | 55026  |
| 232224_at    | mannan-binding lectin serine peptidase 1                            | MASP1     | 1,41 | 0,00038423  | chr3q27-q28     | AI274095  | 5648   |
| 227180_at    | ELOVL family member 7, elongation of long chain fatty acids (yeast) | ELOVL7    | 1,41 | 0,000795458 | chr5q12.1       | AW138767  | 79993  |
| 212353_at    | sulfatase 1                                                         | SULF1     | 1,41 | 0,0186831   | chr8q13.2-q13.3 | AI479175  | 23213  |
| 231001_at    | fin bud initiation factor                                           | FIBIN     | 1,41 | 0,0244448   | chr1p14.2       | AI755024  | 387758 |
| 1558212_at   | hypothetical LOC401491                                              | FLJ35024  | 1,41 | 0,03966825  | chr9p24.2       | BC004474  | 401491 |
| 201701_s_at  | progesterone receptor membrane component 2                          | PGRMC2    | 1,41 | 0,000842835 | chr4q26         | NM_006320 | 10424  |

### Repressed transcripts

|             |                                                                                               |           |       |             |                                               |           |        |
|-------------|-----------------------------------------------------------------------------------------------|-----------|-------|-------------|-----------------------------------------------|-----------|--------|
| 207746_at   | polymerase (DNA directed), theta                                                              | POLQ      | -1,41 | 0,02882389  | chr3q13.33                                    | NM_014125 | 10721  |
| 215711_s_at | WEE1 homolog (S. pombe)                                                                       | WEE1      | -1,41 | 0,01792984  | chr11p15.3-p15.1                              | AJ277546  | 7465   |
| 236966_at   | armadillo repeat containing 8                                                                 | ARMC8     | -1,41 | 0,03713555  | chr3q22.3                                     | BF942281  | 347736 |
| 203343_at   | UDP-glucose dehydrogenase                                                                     | UGDH      | -1,41 | 7,30089E-05 | chr4p15.1                                     | NM_003359 | 7358   |
| 231297_at   | DOT1-like, histone H3 methyltransferase (S. cerevisiae)                                       | DOT1L     | -1,41 | 0,002009508 | chr19p13.3                                    | AI479899  | 84444  |
| 228998_at   | trinucleotide repeat containing 6B                                                            | TNRC6B    | -1,41 | 0,02725063  | chr22q13.1                                    | AV693653  | NA     |
| 214877_at   | CDK5 regulatory subunit associated protein 1-like 1                                           | CDKAL1    | -1,41 | 0,002946474 | chr6p22.3                                     | BE794663  | 54901  |
| 222665_at   | family with sequence similarity 82, member B                                                  | FAM82B    | -1,41 | 0,000970234 | chr8q21.3                                     | AK000672  | 51115  |
| 219158_s_at | NMDA receptor regulated 1                                                                     | NARG1     | -1,42 | 9,95583E-05 | chr4q31.1                                     | NM_025085 | 80155  |
| 233827_s_at | suppressor of Ty 16 homolog (S. cerevisiae)                                                   | SUPT16H   | -1,42 | 9,19268E-05 | chr14q11.2                                    | AK024072  | 11198  |
| 202647_s_at | neuroblastoma RAS viral (v-ras) oncogene homolog                                              | NRAS      | -1,42 | 4,41098E-07 | chr1p13.2                                     | NM_002524 | 4893   |
| 209680_s_at | kinesin family member C1                                                                      | KIFC1     | -1,42 | 0,001883455 | chr6p21.3                                     | BC000712  | 3833   |
| 221104_s_at | nipsnap homolog 3B (C. elegans)                                                               | NIPSNAP3B | -1,42 | 0,000181148 | chr9q31.1                                     | NM_018376 | 55335  |
| 214946_x_at | family with sequence similarity 21, member B /// family with sequence similarity 21, member A | FAM21A    | -1,42 | 0,00174287  | chr10q11.1 /// chr10q11.22<br>/// chr10q11.23 | AV728658  | 387680 |
| 217811_at   | selenoprotein T                                                                               | SELT      | -1,42 | 4,38967E-05 | chr3q25.1                                     | NM_016275 | 51714  |
| 1558561_at  | histocompatibility (minor) 13                                                                 | HM13      | -1,42 | 0,04683448  | chr20q11.21                                   | AK074686  | 81502  |
| 202038_at   | ubiquitination factor E4A (UFD2 homolog, yeast)                                               | UBE4A     | -1,42 | 3,10698E-06 | chr11q23.3                                    | NM_004788 | 9354   |
| 238443_at   | transcription factor A, mitochondrial                                                         | TFAM      | -1,42 | 0,000700031 | chr10q21                                      | BE546873  | 7019   |
| 201337_s_at | vesicle-associated membrane protein 3 (cellubrevin)                                           | VAMP3     | -1,42 | 4,74729E-06 | chr1p36.23                                    | NM_004781 | 9341   |
| 211228_s_at | RAD17 homolog (S. pombe)                                                                      | RAD17     | -1,42 | 0,000522092 | chr5q13                                       | AF085736  | 5884   |

|              |                                                                        |           |       |             |                  |           |        |
|--------------|------------------------------------------------------------------------|-----------|-------|-------------|------------------|-----------|--------|
| 200770_s_at  | laminin, gamma 1 (formerly LAMB2)                                      | LAMC1     | -1,42 | 1,03906E-05 | chr1q31          | J03202    | 3915   |
| 224676_at    | transmembrane emp24 protein transport domain containing 4              | TMED4     | -1,42 | 4,19116E-06 | chr7p13          | AI472339  | 222068 |
| 239950_at    | homeo box A11, antisense                                               | HOXA11S   | -1,42 | 0,01358209  | chr7p15.2        | AW137133  | NA     |
| 224064_s_at  | dehydrodolichyl diphosphate synthase                                   | DHDDS     | -1,42 | 0,001325151 | chr1p36.11       | BC004117  | 79947  |
| 226506_at    | thrombospondin, type I, domain containing 4                            | THSD4     | -1,42 | 0,0272523   | chr15q23         | AI742570  | 79875  |
| 206852_at    | EPH receptor A7                                                        | EPHA7     | -1,42 | 0,001772201 | chr6q16.1        | NM_004440 | 2045   |
| 203885_at    | RAB21, member RAS oncogene family                                      | RAB21     | -1,42 | 0,000107135 | chr12q21.1       | NM_014999 | 23011  |
| 225665_at    | sterile alpha motif and leucine zipper containing kinase AZK           | ZAK       | -1,42 | 9,34549E-06 | chr2q24.2        | AI129320  | 51776  |
| 207464_at    | S-adenosylhomocysteine hydrolase-like 1                                | AHCYL1    | -1,42 | 0,002868094 | chr1p13.2        | NM_014121 | 10768  |
| 204369_at    | phosphoinositide-3-kinase, catalytic, alpha polypeptide                | PIK3CA    | -1,43 | 0,001543983 | chr3q26.3        | NM_006218 | 5290   |
| 223274_at    | transcription factor 19 (SC1)                                          | TCF19     | -1,43 | 0,000327912 | chr6p21.3        | BC002493  | 6941   |
| 203870_at    | ubiquitin specific peptidase 46                                        | USP46     | -1,43 | 0,004005294 | chr4q12          | BE856374  | 64854  |
| 225440_at    | 1-acylglycerol-3-phosphate O-acyltransferase 3                         | AGPAT3    | -1,43 | 0,000318038 | chr21q22.3       | BE737251  | 56894  |
| 212300_at    | taxilin alpha                                                          | TXLNA     | -1,43 | 0,000561495 | chr1p35.1        | AL049795  | 8668   |
| 213238_at    | ATPase, Class V, type 10D                                              | ATP10D    | -1,43 | 0,01075097  | chr4p12          | AI478147  | 57205  |
| 200813_s_at  | platelet-activating factor acetylhydrolase, isoform Ib                 | PAFAH1B1  | -1,43 | 2,01466E-06 | chr17p13.3       | BE256969  | 5048   |
| 204233_s_at  | choline kinase alpha                                                   | CHKA      | -1,43 | 0,01358209  | chr11q13.2       | AI991328  | 1119   |
| 244698_at    | CMT1A duplicated region transcript 4                                   | CDRT4     | -1,43 | 0,019582    | chr17p12         | AW297656  | 284040 |
| 203967_at    | cell division cycle 6 homolog (S. cerevisiae)                          | CDC6      | -1,43 | 4,02507E-06 | chr17q21.3       | U77949    | 990    |
| 221771_s_at  | M-phase phosphoprotein, mpp8                                           | HSMPP8    | -1,43 | 0,01055064  | chr13q12.11      | BC003542  | 54737  |
| 228455_at    | RNA binding motif protein 15                                           | RBM15     | -1,43 | 0,03826401  | chr1p13          | AI092824  | 9122   |
| 210756_s_at  | Notch homolog 2 (Drosophila)                                           | NOTCH2    | -1,43 | 0,0004794   | chr1p13-p11      | AF308601  | 4853   |
| 221041_s_at  | solute carrier family 17 (anion/sugar transporter), member 5           | SLC17A5   | -1,43 | 0,02680892  | chr6q14-q15      | NM_012434 | 26503  |
| 206500_s_at  | chromosome 14 open reading frame 106                                   | C14orf106 | -1,43 | 0,01281857  | chr14q21.3       | NM_018353 | 55320  |
| 202526_at    | SMAD family member 4                                                   | SMAD4     | -1,43 | 0,007756548 | chr18q21.1       | U44378    | 4089   |
| 204341_at    | tripartite motif-containing 16 /// tripartite motif-containing 16-like | TRIM16    | -1,43 | 0,001045701 | chr17p11.2       | NM_006470 | 10626  |
| 211665_s_at  | son of sevenless homolog 2 (Drosophila)                                | SOS2      | -1,43 | 0,03830453  | chr14q21         | L20686    | 6655   |
| 209234_at    | kinesin family member 1B                                               | KIF1B     | -1,43 | 0,000227303 | chr1p36.2        | BF939474  | 23095  |
| 232591_s_at  | transmembrane protein 30A                                              | TMEM30A   | -1,43 | 0,000149105 | chr6q14.1        | AK022883  | 55754  |
| 211814_s_at  | cyclin E2                                                              | CCNE2     | -1,43 | 0,00813838  | chr8q22.1        | AF112857  | 9134   |
| 201779_s_at  | ring finger protein 13                                                 | RNF13     | -1,43 | 5,53854E-07 | chr3q25.1        | AF070558  | 11342  |
| 202470_s_at  | cleavage and polyadenylation specific factor 6, 68kDa                  | CPSF6     | -1,43 | 0,003259391 | chr12q15         | NM_007007 | 11052  |
| 1555112_a_at | chromosome 1 open reading frame 114                                    | C1orf114  | -1,43 | 0,001005364 | chr1q24          | BC026073  | 57821  |
| 212393_at    | SET binding factor 1                                                   | SBF1      | -1,43 | 0,001045701 | chr22q13.33      | AL096767  | 6305   |
| 218072_at    | COMM domain containing 9                                               | COMMD9    | -1,43 | 0,000139015 | chr1p13          | NM_014186 | 29099  |
| 213679_at    | tetratricopeptide repeat domain 30A                                    | TTC30A    | -1,43 | 0,002896609 | chr2q31.2        | AL049329  | 92104  |
| 224455_s_at  | ADP-dependent glucokinase                                              | ADPGK     | -1,43 | 0,01025905  | chr15q24.1       | BC006112  | 83440  |
| 201668_x_at  | myristoylated alanine-rich protein kinase C substrate                  | MARCKS    | -1,44 | 0,00410563  | chr6q22.2        | AW163148  | 4082   |
| 1553117_a_at | serine/threonine kinase 38                                             | STK38     | -1,44 | 0,02196018  | chr6p21          | NM_007271 | 11329  |
| 225401_at    | chromosome 1 open reading frame 85                                     | C1orf85   | -1,44 | 0,001050922 | chr1q22          | BF977145  | 112770 |
| 238416_x_at  | conserved nuclear protein NHN1                                         | NHN1      | -1,44 | 0,03993592  | chr16q24.2-q24.3 | BF968618  | 124245 |
| 225162_at    | SH3 domain protein D19                                                 | SH3D19    | -1,44 | 0,001025303 | chr4q31.3        | BG285417  | 152503 |
| 222476_at    | CCR4-NOT transcription complex, subunit 6                              | CNOT6     | -1,44 | 3,34504E-05 | chr5q35.3        | AA633196  | 57472  |
| 1554794_a_at | ubiquitin protein ligase E3C                                           | UBE3C     | -1,44 | 8,74732E-05 | chr7q36.3        | BC014029  | 9690   |
| 219493_at    | SHC SH2-domain binding protein 1                                       | SHCBP1    | -1,44 | 8,22828E-09 | chr16q11.2       | NM_024745 | 79801  |

|              |                                                                |           |       |             |                       |           |        |
|--------------|----------------------------------------------------------------|-----------|-------|-------------|-----------------------|-----------|--------|
| 211984_at    | calmodulin 1 (phosphorylase kinase, delta)                     | CALM1     | -1,44 | 4,74729E-06 | chr14q24-q31          | AI653730  | 801    |
| 217620_s_at  | phosphoinositide-3-kinase, catalytic, beta polypeptide         | PIK3CB    | -1,44 | 0,02108757  | chr3q22.3             | AA805318  | 5291   |
| 218192_at    | inositol hexaphosphate kinase 2                                | IHPK2     | -1,44 | 0,002747842 | chr3p21.31            | NM_016291 | 51447  |
| 218362_s_at  | DIS3 mitotic control homolog (S. cerevisiae)                   | DIS3      | -1,44 | 0,000109138 | chr13q22.1            | NM_014953 | 22894  |
| 214446_at    | elongation factor, RNA polymerase II, 2                        | ELL2      | -1,44 | 0,02784748  | chr5q15               | NM_012081 | 22936  |
| 202247_s_at  | metastasis associated 1                                        | MTA1      | -1,44 | 0,003368513 | chr14q32.3            | BE561596  | 9112   |
| 206184_at    | v-crk sarcoma virus CT10 oncogene homolog (avian)-like         | CRKL      | -1,44 | 0,01493411  | chr22q11 22q11.21     | NM_005207 | 1399   |
| 202719_s_at  | testis derived transcript (3 LIM domains)                      | TES       | -1,44 | 4,19116E-06 | chr7q31.2             | BC001451  | 26136  |
| 200800_s_at  | heat shock 70kDa protein 1A /// heat shock 70kDa protein 1B    | HSPA1A    | -1,44 | 0,001716531 | chr6p21.3             | NM_005345 | 3303   |
| 1566324_a_at | v-maf musculoaponeurotic fibrosarcoma oncogene homolog (avian) | MAF       | -1,44 | 0,01736716  | chr16q22-q23          | AA442149  | 4094   |
| 203051_at    | bromo adjacent homology domain containing 1                    | BAHD1     | -1,45 | 0,004474236 | chr15q15.1            | NM_014952 | 22893  |
| 34858_at     | potassium channel tetramerisation domain containing 2          | KCTD2     | -1,45 | 0,01618524  | chr17q25.1            | D79998    | 23510  |
| 226647_at    | transmembrane protein 25                                       | TMEM25    | -1,45 | 0,0339796   | chr11q23.3            | AL562445  | 84866  |
| 208493_at    | homeobox A11                                                   | HOXA11    | -1,45 | 0,008444999 | chr7p15-p14           | NM_005523 | 3207   |
| 212602_at    | WD repeat and FYVE domain containing 3                         | WDFY3     | -1,45 | 0,02761309  | chr4q21.23            | AI806395  | 23001  |
| 240551_at    | zinc finger and BTB domain containing 45                       | ZBTB45    | -1,45 | 0,000795458 | chr19q13.43           | BE550601  | 84878  |
| 212150_at    | KIAA0143 protein                                               | KIAA0143  | -1,45 | 0,001611241 | chr8q24.22            | AA805651  | 23167  |
| 201775_s_at  | KIAA0494                                                       | KIAA0494  | -1,45 | 0,03035844  | chr1pter-p22.1        | AA676790  | 9813   |
| 219978_s_at  | nucleolar and spindle associated protein 1                     | NUSAP1    | -1,45 | 6,62059E-06 | chr15q15.1            | NM_018454 | 51203  |
| 1555408_at   | B melanoma antigen family, member 4                            | BAGE2     | -1,45 | 4,43152E-26 | chr21p /// chr21p11.1 | AF218570  | 85317  |
| 200672_x_at  | spectrin, beta, non-erythrocytic 1                             | SPTBN1    | -1,45 | 0,008343976 | chr2p21               | NM_003128 | 6711   |
| 1564282_a_at | hypothetical protein LOC285708                                 | LOC285708 | -1,45 | 0,01001464  | chr5q21.2             | AK092078  | 285708 |
| 224149_x_at  | sarcolemma associated protein                                  | SLMAP     | -1,46 | 4,28366E-05 | chr3p21.2-p14.3       | AF304450  | 7871   |
| 234929_s_at  | spermatogenesis associated 7                                   | SPATA7    | -1,46 | 0,00048746  | chr14q31.3            | AF144488  | 55812  |
| 1554397_s_at | UEV and lactate/malate dehydrogenase domains                   | UEVLD     | -1,46 | 0,000796013 | chr11p15.1            | BC011011  | 55293  |
| 224097_s_at  | F11 receptor                                                   | F11R      | -1,46 | 0,03032018  | chr1q21.2-q21.3       | AF191495  | 50848  |
| 204426_at    | transmembrane emp24 domain trafficking protein 2               | TMED2     | -1,46 | 2,59265E-06 | chr12q24.31           | NM_006815 | 10959  |
| 1552627_a_at | Rho GTPase activating protein 5                                | ARHGAP5   | -1,46 | 0,04733453  | chr14q12              | NM_001173 | 394    |
| 209897_s_at  | slit homolog 2 (Drosophila)                                    | SLIT2     | -1,46 | 5,09069E-06 | chr4p15.2             | AF055585  | 9353   |
| 227713_at    | katanin p60 subunit A-like 1                                   | KATNAL1   | -1,46 | 0,001057542 | chr13q12.3            | AI807482  | 84056  |
| 225046_at    | Hypothetical gene supported by AL713796                        | LOC389831 | -1,46 | 0,000959188 | ---                   | AL521247  | 389831 |
| 204833_at    | ATG12 autophagy related 12 homolog (S. cerevisiae)             | ATG12     | -1,46 | 1,31114E-05 | chr5q21-q22           | NM_004707 | 9140   |
| 215215_s_at  | exonuclease NEF-sp                                             | LOC81691  | -1,46 | 0,003746964 | chr16p12.2            | AC004381  | 6296   |
| 228282_at    | Major facilitator superfamily domain containing 8              | MFSD8     | -1,46 | 0,002087986 | chr4q28.1-q28.2       | AW611550  | 256471 |
| 1557950_at   | serologically defined colon cancer antigen 1                   | SDCCAG1   | -1,46 | 0,000604683 | chr14q22              | BF984340  | 9147   |
| 38241_at     | butyrophilin, subfamily 3, member A3                           | BTN3A3    | -1,46 | 0,02147843  | chr6p21.3             | U90548    | 10384  |
| 1554251_at   | heterochromatin protein 1, binding protein 3                   | HP1BP3    | -1,46 | 0,01810978  | chr1p36.12            | BC022342  | 50809  |
| 226095_s_at  | ataxin 1-like                                                  | ATXN1L    | -1,46 | 4,92926E-05 | chr16q22.3            | AW138861  | 146517 |
| 220299_at    | spermatogenesis associated 6                                   | SPATA6    | -1,46 | 0,02125522  | chr1p33               | NM_019073 | 54558  |
| 217539_at    | chromosome 18 open reading frame 25                            | C18orf25  | -1,46 | 0,0198719   | chr18q21.1            | W28849    | 147339 |
| 242984_at    | muskelin 1, intracellular mediator containing kelch motifs     | MKLN1     | -1,46 | 0,02945376  | chr7q32               | BF723626  | 4289   |
| 214672_at    | tubulin tyrosine ligase-like family, member 5                  | TLL5      | -1,46 | 0,001633772 | chr14q24.3            | AB023215  | 23093  |
| 228191_at    | feline leukemia virus subgroup C cellular receptor 1           | FLVCR1    | -1,46 | 9,12501E-06 | chr1q32.3             | AA206016  | NA     |
| 226648_at    | hypoxia-inducible factor 1, alpha subunit inhibitor            | HIF1AN    | -1,47 | 5,53563E-05 | chr10q24              | AI769745  | NA     |
| 206686_at    | pyruvate dehydrogenase kinase, isozyme 1                       | PDK1      | -1,47 | 0,00095555  | chr2q31.1             | NM_002610 | 5163   |
| 233141_s_at  | suppression of tumorigenicity 7 like                           | ST7L      | -1,47 | 0,03968098  | chr1p13.2             | AK021719  | 54879  |
| 236313_at    | cyclin-dependent kinase inhibitor 2B (p15, inhibits CDK4)      | CDKN2B    | -1,47 | 0,01079108  | chr9p21               | AW444761  | 1030   |

|              |                                                              |                   |       |             |                           |           |        |
|--------------|--------------------------------------------------------------|-------------------|-------|-------------|---------------------------|-----------|--------|
| 222661_at    | angiogenic factor with G patch and FHA domains 1             | AGGF1             | -1,47 | 4,3263E-06  | chr5q13.3                 | AA528017  | 55109  |
| 208926_at    | sialidase 1 (lysosomal sialidase)                            | NEU1              | -1,47 | 0,000706064 | chr6p21.3                 | U84246    | 4758   |
| 242963_at    | sphingomyelin synthase 2                                     | SGMS2             | -1,47 | 0,006199709 | chr4q25                   | AI160370  | 166929 |
| 223582_at    | G protein-coupled receptor 98                                | GPR98             | -1,47 | 0,007613273 | chr5q13                   | AF055084  | 84059  |
| 202626_s_at  | v-yes-1 Yamaguchi sarcoma viral related oncogene homolog     | LYN               | -1,47 | 0,02527125  | chr8q13                   | NM_002350 | 4067   |
| 229664_at    | mitogen-activated protein kinase 8                           | MAPK8             | -1,47 | 0,008736427 | chr10q11.22               | AI379407  | 5599   |
| 225366_at    | phosphoglucomutase 2                                         | PGM2              | -1,47 | 0,000112995 | chr4p14                   | AI652855  | 55276  |
| 1553338_at   | chromosome 1 open reading frame 55                           | C1orf55           | -1,47 | 0,000190745 | chr1q42.12                | NM_152608 | 163859 |
| 232708_at    | galactose-1-phosphate uridylyltransferase                    | GALT              | -1,47 | 0,03090305  | chr9p13                   | AA453223  | 2592   |
| 215991_s_at  | KIAA0090                                                     | KIAA0090          | -1,47 | 0,01435044  | chr1p36.13                | AU121504  | 23065  |
| 232553_at    | phosphate cytidylyltransferase 1, choline, beta              | PCYT1B            | -1,48 | 0,004769376 | chrXp22.11                | AI857508  | 9468   |
| 200988_s_at  | proteasome (prosome, macropain) activator subunit 3          | PSME3             | -1,48 | 0,02473125  | chr17q21                  | NM_005789 | 10197  |
| 203630_s_at  | component of oligomeric golgi complex 5                      | COG5              | -1,48 | 6,94748E-06 | chr7q22-q31               | NM_006348 | 10466  |
| 225414_at    | ring finger protein 149                                      | RNF149            | -1,48 | 7,79839E-06 | chr2q11.2                 | AL558987  | 284996 |
| 207219_at    | zinc finger protein 643                                      | ZNF643            | -1,48 | 0,01862546  | chr1p34.2                 | NM_023070 | 65243  |
| 210224_at    | major histocompatibility complex, class I-related            | MR1               | -1,48 | 0,02091254  | chr1q25.3                 | AF031469  | 3140   |
| 226150_at    | phosphatidic acid phosphatase type 2 domain containing 1B    | PPAPDC1B          | -1,48 | 0,000387686 | chr8p12                   | BF111651  | 84513  |
| 216266_s_at  | ADP-ribosylation factor guanine nucleotide-exchange factor 1 | ARFGEF1           | -1,48 | 5,87162E-05 | chr8q13                   | AK025637  | 10565  |
| 207590_s_at  | centromere protein I                                         | CENPI             | -1,48 | 0,0389701   | chrXq22.1                 | NM_006733 | 2491   |
| 228725_x_at  | protein arginine methyltransferase 2                         | PRMT2             | -1,48 | 1,05836E-07 | chr21q22.3                | BF003112  | 3275   |
| 214918_at    | heterogeneous nuclear ribonucleoprotein M                    | HNRPM             | -1,48 | 0,03422539  | chr19p13.3-p13.2          | AK024911  | 4670   |
| 201335_s_at  | Rho guanine nucleotide exchange factor (GEF) 12              | ARHGEF12          | -1,48 | 0,01347745  | chr11q23.3                | NM_015313 | 23365  |
| 238421_at    | Ring finger and CCCH-type zinc finger domains 2              | RC3H2             | -1,49 | 0,02173186  | chr9q34                   | N86386    | 54542  |
| 210484_s_at  | tumor necrosis factor receptor superfamily, member 10c       | TNFRSF10C         | -1,49 | 0,04039031  | chr8p21.2 /// chr8p22-p21 | BC005043  | 8794   |
| 202129_s_at  | RIO kinase 3 (yeast)                                         | RIOK3             | -1,49 | 4,74729E-06 | chr18q11.2                | AW006290  | 8780   |
| 213039_at    | rho/rac guanine nucleotide exchange factor (GEF) 18          | ARHGEF18          | -1,49 | 9,83585E-06 | chr19p13.3                | AB011093  | 23370  |
| 219774_at    | coiled-coil domain containing 93                             | CCDC93            | -1,49 | 0,003993352 | chr2q14.1                 | NM_019044 | 54520  |
| 1555326_a_at | ADAM metallopeptidase domain 9 (meltrin gamma)               | ADAM9             | -1,49 | 4,68314E-06 | chr8p11.23                | AF495383  | 8754   |
| 235024_at    | PHD finger protein 17                                        | PHF17             | -1,49 | 0,000245434 | chr4q26-q27               | AI868315  | 79960  |
| 209878_s_at  | v-rel reticuloendotheliosis viral oncogene homolog A         | RELA              | -1,49 | 0,02293315  | chr11q13                  | M62399    | 5970   |
| 236227_at    | transmembrane protein 161B                                   | TMEM161B          | -1,49 | 0,01464503  | chr5q14.3                 | BF106392  | 153396 |
| 231886_at    | similar to hypothetical protein LOC284701                    | DKFZP434B2<br>016 | -1,49 | 0,0191567   | chr16q24.3                | AL137655  | 388572 |
| 223594_at    | transmembrane protein 117                                    | TMEM117           | -1,49 | 0,01912392  | chr12q12                  | AL136855  | 84216  |
| 220658_s_at  | aryl hydrocarbon receptor nuclear translocator-like 2        | ARNTL2            | -1,49 | 0,03071038  | chr12p12.2-p11.2          | NM_020183 | 56938  |
| 1555225_at   | chromosome 1 open reading frame 43                           | C1orf43           | -1,49 | 0,001939665 | chr1q21.2                 | BC008306  | 25912  |
| 204357_s_at  | LIM domain kinase 1                                          | LIMK1             | -1,50 | 0,03838182  | chr7q11.23                | NM_002314 | 3984   |
| 206113_s_at  | RAB5A, member RAS oncogene family                            | RAB5A             | -1,50 | 8,32178E-06 | chr3p24-p22               | NM_004162 | 5868   |
| 205409_at    | FOS-like antigen 2                                           | FOSL2             | -1,50 | 0,01693318  | chr2p23.3                 | NM_005253 | 2355   |
| 238427_at    | GrpE-like 2, mitochondrial (E. coli)                         | GRPEL2            | -1,50 | 0,03499667  | chr5q33.1                 | C15005    | 134266 |
| 202064_s_at  | sel-1 suppressor of lin-12-like (C. elegans)                 | SEL1L             | -1,50 | 0,008033444 | chr14q24.3-q31            | AF052059  | 6400   |
| 226038_at    | LON peptidase N-terminal domain and ring finger 1            | LONRF1            | -1,50 | 5,6818E-05  | chr8p23.1                 | BF680438  | 91694  |
| 223251_s_at  | ankyrin repeat domain 10                                     | ANKRD10           | -1,50 | 0,000632732 | chr13q34                  | BC001727  | 55608  |
| 203736_s_at  | PTPRF interacting protein, binding protein 1 (liprin beta 1) | PPFIBP1           | -1,50 | 0,005172444 | chr12p11.23-p11.22        | NM_003622 | 8496   |
| 206383_s_at  | GTPase activating protein (SH3 domain) binding protein 2     | G3BP2             | -1,50 | 4,29523E-05 | chr4q21.1                 | NM_012297 | 9908   |
| 1555564_a_at | complement factor I                                          | CFI               | -1,50 | 0,01388627  | chr4q25                   | BC020718  | 3426   |



|              |                                                                    |           |       |              |                            |           |        |
|--------------|--------------------------------------------------------------------|-----------|-------|--------------|----------------------------|-----------|--------|
| 213805_at    | abhydrolase domain containing 5                                    | ABHD5     | -1,51 | 0,007336186  | chr3p21                    | AI692428  | 51099  |
| 208710_s_at  | adaptor-related protein complex 3, delta 1 subunit                 | AP3D1     | -1,51 | 0,000795458  | chr19p13.3                 | AI424923  | 8943   |
| 208902_s_at  | ribosomal protein S28                                              | RPS28     | -1,51 | 0,003151686  | chr19p13.2                 | BF431363  | 256949 |
| 229559_at    | hypothetical protein FLJ40125                                      | FLJ40125  | -1,51 | 0,01013932   | chr19q13.32                | BE732320  | 147699 |
| 235588_at    | establishment of cohesion 1 homolog 2 (S. cerevisiae)              | ESCO2     | -1,51 | 0,02198536   | chr8p21.1                  | AA740849  | 157570 |
| 202316_x_at  | ubiquitination factor E4B (UFD2 homolog, yeast)                    | UBE4B     | -1,51 | 0,006460136  | chr1p36.3                  | AW241715  | 10277  |
| 238759_at    | coiled-coil domain containing 88A                                  | CCDC88A   | -1,51 | 0,004778953  | chr2p16.1                  | AI681810  | 55704  |
| 1570523_s_at | ATG10 autophagy related 10 homolog (S. cerevisiae)                 | ATG10     | -1,51 | 0,000886153  | chr5q14.2                  | AF318326  | 83734  |
| 1554417_s_at | anterior pharynx defective 1 homolog A (C. elegans)                | APH1A     | -1,51 | 5,351116E-05 | chr1p36.13-q31.3           | AY113699  | 51107  |
| 208997_s_at  | uncoupling protein 2 (mitochondrial, proton carrier)               | UCP2      | -1,51 | 0,000439407  | chr1q13                    | U82819    | 7351   |
| 217790_s_at  | signal sequence receptor, gamma                                    | SSR3      | -1,51 | 0,000974794  | chr3q25.31                 | NM_007107 | 6747   |
| 212851_at    | DCN1, defective in cullin neddylation 1, domain containing 4       | DCUN1D4   | -1,51 | 2,23297E-05  | chr4q12                    | AA194584  | 23142  |
| 214056_at    | Myeloid cell leukemia sequence 1 (BCL2-related)                    | MCL1      | -1,52 | 0,02556069   | chr1q21                    | BF981280  | 4170   |
| 203628_at    | insulin-like growth factor 1 receptor                              | IGF1R     | -1,52 | 0,008283178  | chr15q26.3                 | H05812    | 3480   |
| 216855_s_at  | heterogeneous nuclear ribonucleoprotein U                          | HNRNPU    | -1,52 | 0,02399395   | chr1q44                    | D13413    | 3192   |
| 204568_at    | KIAA0831                                                           | KIAA0831  | -1,52 | 0,003746964  | chr14q22.3                 | NM_014924 | 22863  |
| 208853_s_at  | calnexin                                                           | CANX      | -1,52 | 1,74647E-11  | chr5q35                    | L18887    | 821    |
| 230534_at    | hypothetical protein MGC15634                                      | MGC15634  | -1,52 | 0,000157385  | chr1q42.13                 | AW025362  | 84841  |
| 203096_s_at  | Rap guanine nucleotide exchange factor (GEF) 2                     | RAPGEF2   | -1,52 | 0,04667966   | chr4q32.1                  | BF439282  | 9693   |
| 209456_s_at  | F-box and WD repeat domain containing 11                           | FBXW11    | -1,52 | 0,000875339  | chr5q35.1                  | AB033281  | 23291  |
| 215891_s_at  | GM2 ganglioside activator                                          | GM2A      | -1,52 | 0,005428052  | chr5q31.3-q33.1            | X61094    | 2760   |
| 205321_at    | eukaryotic translation initiation factor 2, subunit 3 gamma, 52kDa | EIF2S3    | -1,52 | 4,67781E-06  | chrXp22.2-p22.1            | NM_001415 | 1968   |
| 217173_s_at  | low density lipoprotein receptor (familial hypercholesterolemia)   | LDLR      | -1,52 | 0,03445698   | chr19p13.3                 | S70123    | 3949   |
| 206139_at    | phosphatidylinositol 4-kinase, catalytic, beta                     | PI4KB     | -1,52 | 0,004769376  | chr1q21                    | NM_002651 | 5298   |
| 76897_s_at   | FK506 binding protein 15, 133kDa                                   | FKBP15    | -1,52 | 0,02907499   | chr9q32                    | AA628140  | 23307  |
| 212690_at    | DDHD domain containing 2                                           | DDHD2     | -1,52 | 1,58801E-07  | chr8p12                    | AB018268  | 23259  |
| 210653_s_at  | branched chain keto acid dehydrogenase E1, beta polypeptide        | BCKDHB    | -1,52 | 0,000107549  | chr6q13-q15                | M55575    | 594    |
| 207403_at    | insulin receptor substrate 4                                       | IRS4      | -1,52 | 1,90851E-05  | chrXq22.3                  | NM_003604 | 8471   |
| 230163_at    | Hypothetical protein LOC143381                                     | LOC143381 | -1,53 | 0,0109085    | chr10q26.11                | AW263087  | 2674   |
| 202249_s_at  | WD repeat domain 42A                                               | WDR42A    | -1,53 | 0,000063039  | chr1q22-q23                | AU146233  | 50717  |
| 212253_x_at  | dystonin                                                           | DST       | -1,53 | 0,000112626  | chr6p12.1                  | BG253119  | 667    |
| 1553962_s_at | ras homolog gene family, member B                                  | RHOB      | -1,53 | 0,007336186  | chr2p24                    | BI668074  | 388    |
| 217859_s_at  | solute carrier family 39 (zinc transporter), member 9              | SLC39A9   | -1,53 | 0,001331983  | chr14q24.1                 | NM_018375 | 55334  |
| 226557_at    | tetratricopeptide repeat domain 5                                  | TTC5      | -1,53 | 0,008120254  | chr14q11.2                 | AW044606  | 91875  |
| 212899_at    | cell division cycle 2-like 6 (CDK8-like)                           | CDC2L6    | -1,53 | 0,000543984  | chr6q21                    | AB028951  | 23097  |
| 221765_at    | UDP-glucose ceramide glucosyltransferase                           | UGCG      | -1,53 | 0,005910053  | chr9q31                    | AI378044  | 7357   |
| 202667_s_at  | solute carrier family 39 (zinc transporter), member 7              | SLC39A7   | -1,53 | 5,63976E-05  | chr6p21.3                  | NM_006979 | 7922   |
| 212619_at    | KIAA0286 protein                                                   | KIAA0286  | -1,53 | 1,01893E-05  | chr12q13.3                 | AW205215  | 23306  |
| 224078_at    | hippocampus abundant gene transcript-like 2                        | HIATL2    | -1,53 | 0,000390116  | chr9q22.33                 | BC005058  | 84278  |
| 211068_x_at  | family with sequence similarity 21, member C                       | FAM21C    | -1,53 | 0,000756646  | chr10q11.1 /// chr10q11.23 | BC006456  | 253725 |
| 217310_s_at  | forkhead box J3                                                    | FOXJ3     | -1,53 | 0,04061638   | chr1pter-q31.3             | AK027075  | 22887  |
| 235333_at    | UDP-Gal:betaGlcNAc beta 1,4- galactosyltransferase, polypeptide 6  | B4GALT6   | -1,53 | 4,19116E-06  | chr18q11                   | BG503479  | 9331   |
| 225375_at    | chromosome 17 open reading frame 32                                | C17orf32  | -1,53 | 0,001032529  | chr17q11.2                 | AW975808  | 147007 |
| 201638_s_at  | cleavage and polyadenylation specific factor 1, 160kDa             | CPSF1     | -1,54 | 0,01247134   | chr8q24.23                 | BE676642  | 29894  |

|              |                                                                                 |           |       |             |                           |           |        |
|--------------|---------------------------------------------------------------------------------|-----------|-------|-------------|---------------------------|-----------|--------|
| 218643_s_at  | cysteine-rich PDZ-binding protein                                               | CRIPT     | -1,54 | 6,02079E-05 | chr2p21                   | NM_014171 | 9419   |
| 1555469_a_at | cytoplasmic linker associated protein 2                                         | CLASP2    | -1,54 | 0,003046698 | chr3p22.3                 | BC029035  | 23122  |
| 232235_at    | dermatan sulfate epimerase-like                                                 | DSEL      | -1,54 | 0,04690383  | chr18q22.1                | AK021539  | 92126  |
| 222507_s_at  | TMEM9 domain family, member B                                                   | TMEM9B    | -1,54 | 3,6766E-06  | chr11p15.3                | AI188389  | 56674  |
| 230697_at    | Bardet-Biedl syndrome 5                                                         | BBS5      | -1,54 | 0,04123778  | chr2q31.1                 | AW418788  | 129880 |
| 202262_x_at  | dimethylarginine dimethylaminohydrolase 2                                       | DDAH2     | -1,54 | 0,01780729  | chr6p21.3                 | NM_013974 | 23564  |
| 232981_s_at  | AP1 gamma subunit binding protein 1                                             | AP1GBP1   | -1,55 | 0,000103659 | chr17q12                  | AF090924  | 11276  |
| 231793_s_at  | calcium/calmodulin-dependent protein kinase (CaM kinase) II delta               | CAMK2D    | -1,55 | 0,001887304 | chr4q26                   | AA448956  | 817    |
| 204317_at    | G-2 and S-phase expressed 1                                                     | GTSE1     | -1,55 | 0,000107135 | chr22q13.2-q13.3          | BF305380  | 51512  |
| 221220_s_at  | SCY1-like 2 (S. cerevisiae)                                                     | SCYL2     | -1,55 | 0,000484192 | chr12q23.1                | NM_017988 | 55681  |
| 226155_at    | KIAA1600                                                                        | KIAA1600  | -1,56 | 0,000282217 | chr10q25.3                | AB046820  | 57700  |
| 219760_at    | lin-7 homolog B (C. elegans)                                                    | LIN7B     | -1,56 | 0,008634456 | chr19q13.3                | NM_022165 | 64130  |
| 201159_s_at  | N-myristoyltransferase 1                                                        | NMT1      | -1,56 | 0,005628019 | chr17q21.31               | NM_021079 | 4836   |
| 217770_at    | phosphatidylinositol glycan anchor biosynthesis, class T                        | PIGT      | -1,56 | 3,16816E-08 | chr20q12-q13.12           | NM_015937 | 51604  |
| 225631_at    | KIAA1706 protein                                                                | KIAA1706  | -1,56 | 0,02903477  | chr7p14                   | BE501865  | 80820  |
| 214157_at    | GNAS complex locus                                                              | GNAS      | -1,56 | 0,002132488 | chr20q13.3                | AA401492  | 2778   |
| 231997_at    | tubulin folding cofactor E-like                                                 | TBCEL     | -1,56 | 0,04749948  | chr11q23.3                | R69910    | 219899 |
| 237856_at    | RAP1, GTP-GDP dissociation stimulator 1                                         | RAP1GDS1  | -1,56 | 0,00166422  | chr4q23-q25               | AI052055  | 5910   |
| 200742_s_at  | tripeptidyl peptidase I                                                         | TPP1      | -1,56 | 0,000238583 | chr11p15                  | BG231932  | 1200   |
| 225930_at    | NFKB inhibitor interacting Ras-like 1                                           | NKIRAS1   | -1,56 | 8,34663E-05 | chr3p24.2                 | AI970120  | 28512  |
| 225613_at    | microtubule associated serine/threonine kinase family member 4                  | MAST4     | -1,56 | 0,001325686 | chr5q12.3                 | AI096389  | 23227  |
| 228569_at    | poly(A) polymerase alpha                                                        | PAPOLA    | -1,56 | 3,03777E-08 | chr14q32.31               | AV683473  | 10914  |
| 1552612_at   | CDC42 small effector 2                                                          | CDC42SE2  | -1,56 | 0,01757326  | chr5q31.1                 | NM_020240 | NA     |
| 243225_at    | hypothetical protein LOC283481                                                  | LOC283481 | -1,57 | 0,01797719  | chr13q33.1                | AI042341  | 2259   |
| 226583_at    | FLJ40142 protein                                                                | FLJ40142  | -1,57 | 0,000118618 | chr12q24.11               | AL560962  | 400073 |
| 204659_s_at  | growth factor, augmenter of liver regeneration                                  | GFER      | -1,57 | 0,02435136  | chr16p13.3-p13.12         | AF124604  | 2671   |
| 229946_at    | p20                                                                             | LOC130074 | -1,57 | 0,003726664 | chr2q21.1                 | BF056651  | 389039 |
| 210664_s_at  | tissue factor pathway inhibitor                                                 | TFPI      | -1,57 | 0,00050553  | chr2q32                   | AF021834  | 7035   |
| 221673_s_at  | casein kinase 1, gamma 1                                                        | CSNK1G1   | -1,57 | 0,001795443 | chr15q22.1-q22.31         | AB042563  | 53944  |
| 224304_x_at  | ninein (GSK3B interacting protein)                                              | NIN       | -1,57 | 0,002339924 | chr14q22.1                | AF223939  | 51199  |
| 236328_at    | zinc finger protein 285A                                                        | ZNF285A   | -1,57 | 0,000352184 | ---                       | AW513227  | 26974  |
| 1553148_a_at | sorting nexin 13                                                                | SNX13     | -1,57 | 0,003909016 | chr7p21.1                 | R75838    | 23161  |
| 233882_s_at  | sema domain, transmembrane domain (TM), and cytoplasmic domain, (semaphorin) 6D | SEMA6D    | -1,57 | 0,02000088  | chr15q21.1                | AK022831  | 80031  |
| 206777_s_at  | crystallin, beta B2                                                             | CRYBB2    | -1,57 | 2,07116E-06 | chr22q11.2-q12.1 22q11.23 | NM_000496 | 1415   |
| 214895_s_at  | ADAM metallopeptidase domain 10                                                 | ADAM10    | -1,58 | 0,002980303 | chr15q2 15q22             | AU135154  | 102    |
| 1552660_a_at | chromosome 5 open reading frame 22                                              | C5orf22   | -1,58 | 2,76897E-09 | chr5p13.3                 | BC021215  | 55322  |
| 211085_s_at  | serine/threonine kinase 4                                                       | STK4      | -1,58 | 0,03968098  | chr20q11.2-q13.2          | Z25430    | 6789   |
| 212157_at    | syndecan 2                                                                      | SDC2      | -1,58 | 5,21997E-05 | chr8q22-q23               | BE048514  | 6383   |
| 209629_s_at  | nuclear transport factor 2-like export factor 2                                 | NXT2      | -1,58 | 0,00062672  | chrXq22.3                 | AF201942  | 55916  |
| 1554481_a_at | erythrocyte membrane protein band 4.1                                           | EPB41     | -1,58 | 0,006885592 | chr1p33-p32               | BC039079  | 2035   |
| 1556551_s_at | solute carrier family 39 (zinc transporter), member 6                           | SLC39A6   | -1,59 | 3,41195E-08 | chr18q12.2                | BQ027619  | 25800  |
| 1564066_at   | spermatogenesis associated, serine-rich 1                                       | C6orf137  | -1,59 | 0,01017889  | chr6p21.1                 | AL833884  | 441151 |
| 220458_at    | FLJ10246                                                                        | FLJ10246  | -1,59 | 5,53854E-07 | chr5p12                   | NM_018038 | 55104  |
| 215501_s_at  | dual specificity phosphatase 10                                                 | DUSP10    | -1,59 | 0,002728423 | chr1q41                   | AK022513  | 11221  |
| 1553691_at   | beta-1,3-N-acetylgalactosaminyltransferase 2                                    | B3GALNT2  | -1,60 | 0,00023597  | chr1q42.3                 | NM_152490 | 148789 |

|              |                                                                        |           |       |             |                   |           |        |
|--------------|------------------------------------------------------------------------|-----------|-------|-------------|-------------------|-----------|--------|
| 216125_s_at  | RAN binding protein 9                                                  | RANBP9    | -1,60 | 0,000145474 | chr6p23           | AF064606  | 10048  |
| 231921_at    | chromosome 2 open reading frame 37                                     | C2orf37   | -1,60 | 2,73216E-05 | chr2q31.1         | AK021599  | 80067  |
| 235683_at    | sestrin 3                                                              | SESN3     | -1,60 | 0,000591803 | chr11q21          | BF685808  | 143686 |
| 226709_at    | roundabout, axon guidance receptor, homolog 2 (Drosophila)             | ROBO2     | -1,60 | 0,01077193  | chr3p12.3         | BE858548  | 6092   |
| 243937_x_at  | centaurin, gamma-like family, member 2                                 | CTGLF2    | -1,60 | 0,02356204  | chr10q22.2        | BF436377  | 439983 |
| 228816_at    | hypothetical protein LOC92270                                          | LOC92270  | -1,60 | 0,005537472 | chr5q14.2         | AK022625  | 92270  |
| 212478_at    | required for meiotic nuclear division 5 homolog A (S. cerevisiae)      | RMND5A    | -1,60 | 0,000964254 | chr2p11.2         | H65865    | 64795  |
| 222074_at    | uroporphyrinogen decarboxylase                                         | UROD      | -1,61 | 0,00850892  | chr1p34           | AW614435  | 7389   |
| 208899_x_at  | ATPase, H+ transporting, lysosomal 34kDa, V1 subunit D                 | ATP6V1D   | -1,61 | 2,93595E-11 | chr14q23-q24.2    | AF100741  | 51382  |
| 207826_s_at  | inhibitor of DNA binding 3, dominant negative helix-loop-helix protein | ID3       | -1,61 | 3,1236E-11  | chr1p36.13-p36.12 | NM_002167 | 3399   |
| 220260_at    | TBC1 domain family, member 19                                          | TBC1D19   | -1,61 | 0,02599533  | chr4p15.2         | NM_018317 | 55296  |
| 211602_s_at  | transient receptor potential cation channel, subfamily C, member 1     | TRPC1     | -1,61 | 4,83761E-06 | chr3q22-q24       | U31110    | 7220   |
| 225337_at    | abhydrolase domain containing 2                                        | ABHD2     | -1,61 | 0,003751667 | chr15q26.1        | AI346910  | 11057  |
| 223078_s_at  | tropomodulin 3 (ubiquitous)                                            | TMOD3     | -1,62 | 0,000880301 | chr15q21.1-q21.2  | AF177171  | 29766  |
| 1558807_at   | ATPase family, AAA domain containing 2B                                | ATAD2B    | -1,62 | 0,04231011  | chr2p24.1-p23.3   | AK094821  | 54454  |
| 202128_at    | KIAA0317                                                               | KIAA0317  | -1,62 | 5,35507E-06 | chr14q24.3        | NM_014821 | 9870   |
| 219222_at    | ribokinase                                                             | RBKS      | -1,63 | 0,001169908 | chr2p23.3         | NM_022128 | 64080  |
| 210734_x_at  | MYC associated factor X                                                | MAX       | -1,63 | 0,000168058 | chr14q23          | M64240    | 4149   |
| 1563687_a_at | FRY-like                                                               | FRYL      | -1,63 | 0,01227528  | chr4p12           | U80082    | 23045  |
| 209862_s_at  | centrosomal protein 57kDa                                              | CEP57     | -1,63 | 2,38533E-08 | chr11q21          | BC001233  | 9702   |
| 212337_at    | taurine upregulated gene 1                                             | TUG1      | -1,63 | 1,48699E-12 | chr22q12.2        | AI687738  | 55000  |
| 204209_at    | phosphate cytidyltransferase 1, choline, alpha                         | PCYT1A    | -1,63 | 0,007418134 | chr3q29           | AI638771  | 5130   |
| 225333_at    | zinc finger protein 496                                                | ZNF496    | -1,64 | 0,02006291  | chr1q44           | AI218383  | 84838  |
| 224868_at    | zinc finger, DHHC-type containing 5                                    | ZDHHCS5   | -1,64 | 3,08543E-05 | chr11q12.1        | BE961925  | 25921  |
| 235314_at    | ribosomal protein L32 pseudogene 3                                     | RPL32P3   | -1,64 | 0,04383745  | chr3q21.3         | W73195    | 132241 |
| 226545_at    | CD109 molecule                                                         | CD109     | -1,64 | 1,17177E-05 | chr6q13           | AL110152  | 135228 |
| 222153_at    | myelin expression factor 2                                             | MYEF2     | -1,64 | 0,02593568  | chr15q21.1        | AK023133  | 50804  |
| 201942_s_at  | carboxypeptidase D                                                     | CPD       | -1,64 | 1,87554E-06 | chr17q11.2        | D85390    | 1362   |
| 200952_s_at  | cyclin D2                                                              | CCND2     | -1,65 | 0,002716492 | chr12p13          | AI635187  | 894    |
| 205535_s_at  | protocadherin 7                                                        | PCDH7     | -1,65 | 1,29253E-06 | chr4p15           | NM_002589 | 5099   |
| 223200_s_at  | large subunit GTPase 1 homolog (S. cerevisiae)                         | LSG1      | -1,65 | 2,61964E-06 | chr3q29           | AI219740  | 55341  |
| 218282_at    | ER degradation enhancer, mannosidase alpha-like 2                      | EDEM2     | -1,66 | 0,000123805 | chr20q11.22       | NM_018217 | 55741  |
| 229178_at    | hypothetical protein LOC145786                                         | LOC145786 | -1,66 | 0,003860442 | chr15q21.1        | AV699825  | 145786 |
| 203639_s_at  | fibroblast growth factor receptor 2                                    | FGFR2     | -1,66 | 6,3508E-05  | chr10q26          | M80634    | 2263   |
| 203641_s_at  | COBL-like 1                                                            | COBLL1    | -1,66 | 0,01435044  | chr2q24.3         | BF002844  | 22837  |
| 223241_at    | sorting nexin 8                                                        | SNX8      | -1,66 | 0,04803939  | chr7p22.2         | AF121858  | 29886  |
| 216549_s_at  | TBC1 domain family, member 22B                                         | TBC1D22B  | -1,66 | 0,01039667  | chr6p21.2         | AL096712  | 9025   |
| 213073_at    | zinc finger, FYVE domain containing 26                                 | ZFYVE26   | -1,66 | 6,4179E-05  | chr14q24.1        | AB002319  | 23503  |
| 203811_s_at  | DnaJ (Hsp40) homolog, subfamily B, member 4                            | DNAJB4    | -1,66 | 9,83585E-06 | chr1p31.1         | NM_007034 | 11080  |
| 229611_at    | leishmanolysin-like (metallopeptidase M8 family)                       | LMLN      | -1,66 | 0,002009508 | chr3q29           | BF056991  | 89782  |
| 208530_s_at  | retinoic acid receptor, beta                                           | RARB      | -1,67 | 9,13731E-05 | chr3p24           | NM_016152 | 5915   |
| 202453_s_at  | general transcription factor IIH, polypeptide 1, 62kDa                 | GTF2H1    | -1,67 | 1,1146E-06  | chr11p15.1-p14    | NM_005316 | 2965   |
| 231926_at    | epidermal growth factor receptor pathway substrate 15-like 1           | EPS15L1   | -1,67 | 0,00120471  | chr19p13.11       | AK023744  | 58513  |
| 1565651_at   | ADP-ribosylation factor 1                                              | ARF1      | -1,68 | 0,009277492 | chr1q42           | BI868311  | NA     |

|              |                                                                    |               |       |             |                  |           |        |
|--------------|--------------------------------------------------------------------|---------------|-------|-------------|------------------|-----------|--------|
| 240793_at    | Titin                                                              | TTN           | -1,68 | 0,005818769 | chr2q31          | BF224054  | 7273   |
| 1553978_at   | myocyte enhancer factor 2B                                         | MEF2B         | -1,68 | 4,04127E-07 | chr19p12         | BC010931  | 4207   |
| 213982_s_at  | RAB GTPase activating protein 1-like                               | RABGAP1L      | -1,69 | 0,02332989  | chr1q24          | BG107203  | 9910   |
| 214474_at    | protein kinase, AMP-activated, beta 2 non-catalytic subunit        | PRKAB2        | -1,69 | 1,70335E-05 | chr1q21.1        | NM_005399 | 5565   |
| 214098_at    | KIAA1107                                                           | KIAA1107      | -1,69 | 0,002900858 | chr1p22.1        | AB029030  | 23285  |
| 207073_at    | cyclin-dependent kinase-like 2 (CDC2-related kinase)               | CDKL2         | -1,69 | 0,01043808  | chr4q21.1        | NM_003948 | 8999   |
| 203248_at    | zinc finger protein 24                                             | ZNF24         | -1,71 | 7,53772E-08 | chr18q12         | NM_006965 | 7572   |
| 1569057_s_at | melanoma inhibitory activity family, member 3                      | MIA3          | -1,71 | 1,40669E-07 | chr1q41          | BC031805  | 375056 |
| 201988_s_at  | cAMP responsive element binding protein-like 2                     | CREBL2        | -1,71 | 2,49633E-07 | chr12p13         | BF438056  | 1389   |
| 235955_at    | MARVEL domain containing 2                                         | MARVELD2      | -1,72 | 0,000482828 | chr5q13.2        | N57927    | 153562 |
| 1555144_at   | ADP-ribosylation factor-like 17                                    | ARL17         | -1,72 | 5,07006E-05 | chr17q21.31      | BC020869  | 51326  |
| 224835_at    | hypothetical protein KIAA1434                                      | RP5-1022P6.2  | -1,72 | 6,24189E-07 | chr20p12.3       | AL109935  | 1980   |
| 202124_s_at  | trafficking protein, kinesin binding 2                             | TRAK2         | -1,73 | 0,000361362 | chr2q33          | AV705253  | 66008  |
| 200935_at    | calreticulin                                                       | CALR          | -1,73 | 4,1697E-12  | chr19p13.3-p13.2 | NM_004343 | 811    |
| 213472_at    | heterogeneous nuclear ribonucleoprotein H1 (H)                     | HNRPH1        | -1,73 | 0,000736931 | chr5q35.3        | AI022387  | 3187   |
| 210790_s_at  | SAR1 gene homolog A (S. cerevisiae)                                | SAR1A         | -1,74 | 1,69374E-07 | chr10q22.1       | BC003658  | 56681  |
| 222716_s_at  | sorting nexin 24                                                   | SNX24         | -1,74 | 7,33181E-07 | chr5q23.2        | AU144093  | 28966  |
| 200615_s_at  | adaptor-related protein complex 2, beta 1 subunit                  | AP2B1         | -1,74 | 1,80525E-13 | chr17q11.2-q12   | AL567295  | 163    |
| 235016_at    | receptor accessory protein 3                                       | REEP3         | -1,75 | 0,000123748 | chr10q21.3       | AL118571  | 221035 |
| 220019_s_at  | zinc finger protein 224                                            | ZNF224        | -1,75 | 0,004748773 | chr19q13.2       | NM_005774 | 7767   |
| 203758_at    | cathepsin O                                                        | CTSO          | -1,75 | 0,001592126 | chr4q31-q32      | AV729484  | 1519   |
| 1556344_at   | hypothetical LOC150051                                             | LOC150051     | -1,75 | 7,10884E-05 | chr21q22.11      | BU621258  | 150051 |
| 1568873_at   | zinc finger protein 519                                            | ZNF519        | -1,75 | 0,01062275  | chr18p11.21      | BC010705  | 162655 |
| 226570_at    | ATPase, Na+/K+ transporting, beta 3 polypeptide                    | ATP1B3        | -1,76 | 0,003370107 | chr3q23          | BF059073  | 483    |
| 221185_s_at  | IQ motif containing G                                              | IQCG          | -1,77 | 0,000123748 | chr3q29          | NM_025111 | 84223  |
| 218817_at    | signal peptidase complex subunit 3 homolog (S. cerevisiae)         | SPCS3         | -1,79 | 6,126E-06   | chr4q34.2        | NM_021928 | 60559  |
| 1552481_s_at | mannosidase, alpha, class 1A, member 2                             | MAN1A2        | -1,79 | 4,92926E-05 | chr1p13          | NM_006699 | 10905  |
| 208430_s_at  | dystrobrevin, alpha                                                | DTNA          | -1,79 | 0,000834052 | chr18q12         | NM_001390 | 1837   |
| 230285_at    | hypothetical protein DKFZp313A2432                                 | DKFZp313A2432 | -1,80 | 5,7047E-07  | chr1p14.2        | BF447829  | 258010 |
| 222853_at    | fibronectin leucine rich transmembrane protein 3                   | FLRT3         | -1,80 | 3,10084E-09 | chr20p11         | N71923    | 23767  |
| 219632_s_at  | transient receptor potential cation channel, subfamily V, member 1 | TRPV1         | -1,81 | 0,01022748  | chr17p13.3       | AF196175  | 7442   |
| 205868_s_at  | protein tyrosine phosphatase, non-receptor type 11                 | PTPN11        | -1,81 | 5,92176E-07 | chr12q24         | L07527    | 5781   |
| 202136_at    | zinc finger, MYND domain containing 11                             | ZMYND11       | -1,82 | 1,03655E-13 | chr10p14         | BE250417  | 10771  |
| 1559469_s_at | signal-induced proliferation-associated 1 like 2                   | SIPA1L2       | -1,85 | 0,001581097 | chr1q42.2        | BC006013  | 57568  |
| 244481_at    | Solute carrier family 25, member 24                                | SLC25A24      | -1,86 | 0,003230707 | chr1p13.3        | BF196523  | 29957  |
| 1566403_at   | small nucleolar RNA, H/ACA box 68                                  | SNORA68       | -1,87 | 2,07116E-06 | chr19p13         | Y11162    | 26780  |
| 203834_s_at  | trans-golgi network protein 2                                      | TGOLN2        | -1,88 | 0,000653768 | chr2p11.2        | NM_006464 | 10618  |
| 204047_s_at  | phosphatase and actin regulator 2                                  | PHACTR2       | -1,89 | 0,01414782  | chr6q24.2        | AW295193  | 9749   |
| 1552737_s_at | WW domain containing E3 ubiquitin protein ligase 2                 | WWP2          | -1,89 | 1,64076E-05 | chr16q22.1       | NM_007014 | 11060  |
| 1569652_at   | myeloid/lymphoid or mixed-lineage leukemia                         | MLLT3         | -1,89 | 0,04939732  | chr9p22          | BC030550  | 4300   |
| 242812_at    | Tripartite motif-containing 26                                     | TRIM26        | -1,90 | 0,03402253  | chr6p21.3        | AW294604  | 414777 |
| 1560017_at   | transmembrane and tetratricopeptide repeat containing 3            | TMTC3         | -1,91 | 0,02603392  | chr12q21.32      | AK074973  | 160418 |
| 216250_s_at  | leupaxin                                                           | LPXN          | -1,91 | 0,009725719 | chr11q12.1       | X77598    | 9404   |
| 215358_x_at  | zinc finger protein 37B                                            | ZNF37B        | -1,91 | 4,51946E-05 | chr10q11.21      | AK026980  | 256112 |
| 206241_at    | karyopherin alpha 5 (importin alpha 6)                             | KPNA5         | -1,92 | 5,9009E-08  | chr6q22.2        | NM_002269 | 3841   |
| 226761_at    | IKAROS family zinc finger 4 (Eos)                                  | IKZF4         | -1,93 | 0,000836736 | chr12q13         | BF940979  | 64375  |

|              |                                                                     |           |       |             |                          |           |        |
|--------------|---------------------------------------------------------------------|-----------|-------|-------------|--------------------------|-----------|--------|
| 1560006_a_at | hypothetical protein LOC646762                                      | LOC646762 | -1,93 | 1,97749E-05 | chr7p15.1                | BG501482  | 442522 |
| 210930_s_at  | v-erb-b2 erythroblastic leukemia viral oncogene homolog 2           | ERBB2     | -1,95 | 6,1709E-05  | chr17q11.2-q12 17q21.1   | AF177761  | 2064   |
| 228635_at    | protocadherin 10                                                    | PCDH10    | -1,95 | 1,80525E-13 | chr4q28.3                | AI640307  | 57575  |
| 203788_s_at  | sema domain, immunoglobulin domain (Ig)                             | SEMA3C    | -1,97 | 0,02518691  | chr7q21-q31              | AI962897  | 10512  |
| 1555829_at   | family with sequence similarity 62 (C2 domain containing) member B  | FAM62B    | -1,97 | 0,00015404  | chr7q36.3                | BC001224  | NA     |
| 220220_at    | leucine rich repeat containing 37, member A4 (pseudogene)           | LRRC37A4  | -2,01 | 4,86569E-05 | chr17q21.31              | NM_018001 | 55073  |
| 219543_at    | phenazine biosynthesis-like protein domain containing               | PBLD      | -2,04 | 6,05642E-21 | chr10pter-q25.3          | NM_022129 | 64081  |
| 205822_s_at  | 3-hydroxy-3-methylglutaryl-Coenzyme A synthase 1 (soluble)          | HMGCS1    | -2,05 | 2,09429E-13 | chr5p14-p13              | NM_002130 | 3157   |
| 201876_at    | paraoxonase 2                                                       | PON2      | -2,09 | 9,721E-20   | chr7q21.3                | NM_000305 | 5445   |
| 223853_at    | blood vessel epicardial substance                                   | BVES      | -2,12 | 4,02507E-06 | chr6q21                  | AF204172  | 11149  |
| 222562_s_at  | tankyrase, TRF1-interacting ankyrin-related ADP-ribose polymerase 2 | TNKS2     | -2,13 | 1,119E-13   | chr10q23.3               | BF060683  | 80351  |
| 244321_at    | GPI deacylase                                                       | PGAP1     | -2,19 | 9,10762E-05 | chr2q33.1                | BF063546  | 80055  |
| 201852_x_at  | collagen, type III, alpha 1                                         | COL3A1    | -2,33 | 4,12246E-06 | chr2q31                  | AI813758  | 1281   |
| 201012_at    | annexin A1                                                          | ANXA1     | -2,82 | 4,77434E-12 | chr9q12-q21.2 9q12-q21.2 | NM_000700 | 301    |
