# Supplementary material
Source: PubMed Central journal article supplement (PMC2728979)
Supplement: 0901259106_ST3_PDF.pdf [file 0901259106_ST3_PDF.pdf]

**Table S3: Analysis of genes induced in BAHD1 knockdown HEK213 cells.**

| <b>Top networks associated to genes induced in BAHD1 KD cells (Ingenuity Pathways Analysis).</b> |                                                                                                                                                                                                                                                     |              |                        |
|--------------------------------------------------------------------------------------------------|-----------------------------------------------------------------------------------------------------------------------------------------------------------------------------------------------------------------------------------------------------|--------------|------------------------|
| <b>Associated Network Functions</b>                                                              | <b>Molecules in Network</b><br>(Molecules in BAHD1-KD transcriptome in upper case)                                                                                                                                                                  | <b>Score</b> | <b>Focus Molecules</b> |
| Cancer, Cell Cycle, Cellular Growth and Proliferation                                            | ALCAM, BCL2L11, Caspase, CDKN1C, CLEC11A, CTH, Cyclin A, Cyclin E, DACH1, DSP, ERK, GAL, IGF2, Igfbp, IGFBP7, IL6R, KISS1R, LGALS3, Mmp, NEFM, PDGF BB, PHLDA1, Rb, RBL1, RET, RUNX2, SCARA3, SEPP1, SLC6A6, SOX8, SULF1, TAC1, TACSTD1, VCAN, WWP1 | 54           | 27                     |
| Immune Response, Respiratory Disease, Organismal Injury and Abnormalities                        | ADCYAP1R1, ALOX5, Ap1, ATF1, CaMKII, COL13A1, Creb, F12, F2R, FSH, hCG, IL1, INDO, ITCH, LDL, MEOX1, NFkB, NID1, NR2F2, P38 MAPK, Pka, Pkc(s), PLA2G7, PLAU, PLC, PLCD3, PRKAR1A, RAP2B, RIPK2, S1PR3, SUMO1, TANK, Tgf beta, TIMP2, Vegf           | 39           | 21                     |

  

| <b>Top Molecular and Cellular Functions associated to genes induced in BAHD1 KD cells (Ingenuity Pathways Analysis).</b> |                                                                                                                                                                                                                                                                                                                               |                     |                    |
|--------------------------------------------------------------------------------------------------------------------------|-------------------------------------------------------------------------------------------------------------------------------------------------------------------------------------------------------------------------------------------------------------------------------------------------------------------------------|---------------------|--------------------|
| <b>Category</b>                                                                                                          | <b>Molecules</b>                                                                                                                                                                                                                                                                                                              | <b>p-value</b>      | <b># Molecules</b> |
| Cell Death                                                                                                               | SAT1, IL6R, PRKAR1A, PHLDA2, RASL10A, PHLDA1, S1PR3, DSP, IGF2, ADCYAP1R1, ALOX5, QKI, LGALS3, RIPK2, IGFBP7, RUNX2, CDKN1C, PLA2G7, STEAP3, F2R, PLAU, SULF1, KAT2B, RET, BCL2L11, CTH, ATF1, RBL1, DACH1, RTN1, GAL, VCAN, PACS2, TAC1, SUMO1, HLF, EMP2, CLEC11A, TANK, ACSL4, TIMP2, INDO                                 | 1,56E-04 - 1,90E-02 | 43                 |
| Cellular Growth and Proliferation                                                                                        | F12, SAT1, IL6R, PRKAR1A, SEC14L2, PHLDA2, RASL10A, PHLDA1, DSP, S1PR3, IGF2, CRLF1, ADCYAP1R1, ALOX5, LAMB1, LGALS3, RIPK2, IGFBP7, ITCH, RUNX2, CDKN1C, STEAP3, KISS1R, F2R, BLZF1, PLAU, TACC2, KAT2B, BCL2L11, RET, CTH, RBL1, CACNA1G, DACH1, GDF11, TFAP2C, GAL, VCAN, TAC1, SUMO1, TACSTD1, CLEC11A, EMP2, TIMP2, INDO | 2,35E-04 - 1,90E-02 | 46                 |

## List of genes associated with Cell Death or Cellular Growth and Proliferation

(55 genes among 104 genes eligible for the analysis)

| Name      | Description                                                                      | Type                       | Entrez Gene ID |
|-----------|----------------------------------------------------------------------------------|----------------------------|----------------|
| ACSL4     | acyl-CoA synthetase long-chain family member 4                                   | enzyme                     | 2182           |
| ADCYAP1R1 | adenylate cyclase activating polypeptide 1 (pituitary) receptor type I           | G-protein coupled receptor | 117            |
| ALOX5     | arachidonate 5-lipoxygenase                                                      | enzyme                     | 240            |
| ATF1      | activating transcription factor 1                                                | transcription regulator    | 466            |
| BCL2L11   | BCL2-like 11 (apoptosis facilitator)                                             | other                      | 10018          |
| BLZF1     | basic leucine zipper nuclear factor 1 (JEM-1)                                    | transcription regulator    | 8548           |
| CACNA1G   | calcium channel, voltage-dependent, T type, alpha 1G subunit                     | ion channel                | 8913           |
| CDKN1C    | cyclin-dependent kinase inhibitor 1C (p57, Kip2)                                 | other                      | 1028           |
| CLEC11A   | C-type lectin domain family 11, member A                                         | growth factor              | 6320           |
| CRLF1     | cytokine receptor-like factor 1                                                  | other                      | 9244           |
| CTH       | cystathionase (cystathionine gamma-lyase)                                        | enzyme                     | 1491           |
| DACH1     | dachshund homolog 1 (Drosophila)                                                 | transcription regulator    | 1602           |
| DSP       | desmoplakin                                                                      | other                      | 1832           |
| EMP2      | epithelial membrane protein 2                                                    | other                      | 2013           |
| F12       | coagulation factor XII (Hageman factor)                                          | peptidase                  | 2161           |
| F2R       | coagulation factor II (thrombin) receptor                                        | G-protein coupled receptor | 2149           |
| GAL       | galanin prepropeptide                                                            | other                      | 51083          |
| GDF11     | growth differentiation factor 11                                                 | growth factor              | 10220          |
| HLF       | hepatic leukemia factor                                                          | transcription regulator    | 3131           |
| HNRNPA1   | heterogeneous nuclear ribonucleoprotein A1                                       | other                      | 3178           |
| IGF2      | insulin-like growth factor 2 (somatomedin A)                                     | growth factor              | 3481           |
| IGFBP7    | insulin-like growth factor binding protein 7                                     | transporter                | 3490           |
| IL6R      | interleukin 6 receptor                                                           | transmembrane receptor     | 3570           |
| INDO      | indoleamine-pyrrole 2,3 dioxygenase                                              | enzyme                     | 3620           |
| ITCH      | itchy E3 ubiquitin protein ligase homolog (mouse)                                | enzyme                     | 83737          |
| KAT2B     | K(lysine) acetyltransferase 2B                                                   | transcription regulator    | 8850           |
| KISS1R    | KISS1 receptor                                                                   | G-protein coupled receptor | 84634          |
| LAMB1     | laminin, beta 1                                                                  | other                      | 3912           |
| LGALS3    | lectin, galactoside-binding, soluble, 3                                          | other                      | 3958           |
| PACS2     | phosphofurin acidic cluster sorting protein 2                                    | other                      | 23241          |
| PHLDA1    | pleckstrin homology-like domain, family A, member 1                              | other                      | 22822          |
| PHLDA2    | pleckstrin homology-like domain, family A, member 2                              | other                      | 7262           |
| PLA2G7    | phospholipase A2, group VII (platelet-activating factor acetylhydrolase, plasma) | enzyme                     | 7941           |

|         |                                                                                            |                            |       |
|---------|--------------------------------------------------------------------------------------------|----------------------------|-------|
| PLAU    | plasminogen activator, urokinase                                                           | peptidase                  | 5328  |
| PRKAR1A | protein kinase, cAMP-dependent, regulatory, type I, alpha (tissue specific extinguisher 1) | kinase                     | 5573  |
| QKI     | quaking homolog, KH domain RNA binding (mouse)                                             | other                      | 9444  |
| RASL10A | RAS-like, family 10, member A                                                              | enzyme                     | 10633 |
| RBL1    | retinoblastoma-like 1 (p107)                                                               | other                      | 5933  |
| RET     | ret proto-oncogene                                                                         | kinase                     | 5979  |
| RIPK2   | receptor-interacting serine-threonine kinase 2                                             | kinase                     | 8767  |
| RTN1    | reticulum 1                                                                                | other                      | 6252  |
| RUNX2   | runt-related transcription factor 2                                                        | transcription regulator    | 860   |
| S1PR3   | sphingosine-1-phosphate receptor 3                                                         | G-protein coupled receptor | 1903  |
| SAT1    | spermidine/spermine N1-acetyltransferase 1                                                 | enzyme                     | 6303  |
| SEC14L2 | SEC14-like 2 (S. cerevisiae)                                                               | transporter                | 23541 |
| STEAP3  | STEAP family member 3                                                                      | transporter                | 55240 |
| SULF1   | sulfatase 1                                                                                | enzyme                     | 23213 |
| SUMO1   | SMT3 suppressor of mif two 3 homolog 1 (S. cerevisiae)                                     | enzyme                     | 7341  |
| TAC1    | tachykinin, precursor 1                                                                    | other                      | 6863  |
| TACC2   | transforming, acidic coiled-coil containing protein 2                                      | other                      | 10579 |
| TACSTD1 | tumor-associated calcium signal transducer 1                                               | other                      | 4072  |
| TANK    | TRAF family member-associated NFKB activator                                               | other                      | 10010 |
| TFAP2C  | transcription factor AP-2 gamma (activating enhancer binding protein 2 gamma)              | transcription regulator    | 7022  |
| TIMP2   | TIMP metalloproteinase inhibitor 2                                                         | other                      | 7077  |
| VCAN    | versican                                                                                   | other                      | 1462  |

### List of PcG target genes upregulated in BAHD1 KD cells

| Name      | Description                                                                |
|-----------|----------------------------------------------------------------------------|
| IGF2      | insulin-like growth factor 2 (somatomedin A)                               |
| CD24      | CD24 molecule                                                              |
| CHRDL1    | chordin-like 1                                                             |
| CPLX1     | complexin 1                                                                |
| LOC152573 | hypothetical protein BC012029                                              |
| RUNX2     | runt-related transcription factor 2                                        |
| SCN4B     | sodium channel, voltage-gated, type IV, beta                               |
| ALOX5     | arachidonate 5-lipoxygenase                                                |
| RET       | ret proto-oncogene                                                         |
| RORB      | RAR-related orphan receptor B                                              |
| MEOX1     | mesenchyme homeobox 1                                                      |
| ADCYAP1R1 | Adenylate cyclase activating polypeptide 1 (pituitary) receptor type I     |
| DDEF1     | development and differentiation enhancing factor 1                         |
| GDF11     | growth differentiation factor 11                                           |
| ZCCHC12   | zinc finger, CCHC domain containing 12                                     |
| SLC10A4   | solute carrier family 10 (sodium/bile acid cotransporter family), member 4 |
| RTN1      | reticulum 1                                                                |
| MEGF11    | multiple EGF-like-domains 11                                               |
| CRLF1     | cytokine receptor-like factor 1                                            |

|           |                                                                                  |
|-----------|----------------------------------------------------------------------------------|
| TACSTD1   | tumor-associated calcium signal transducer 1                                     |
| TFAP2C    | transcription factor AP-2 gamma (activating enhancer binding protein 2 gamma)    |
| HLF       | hepatic leukemia factor                                                          |
| CACNA1G   | calcium channel, voltage-dependent, T type, alpha 1G subunit                     |
| C6orf141  | chromosome 6 open reading frame 141                                              |
| GAL       | galanin                                                                          |
| ProSAPiP1 | ProSAPiP1 protein                                                                |
| DSP       | desmoplakin                                                                      |
| ACSL1     | acyl-CoA synthetase long-chain family member 1                                   |
| PLA2G7    | phospholipase A2, group VII (platelet-activating factor acetylhydrolase, plasma) |
| SCOC      | short coiled-coil protein                                                        |
| F12       | coagulation factor XII (Hageman factor)                                          |
| ADCY1     | adenylate cyclase 1 (brain)                                                      |
| D4S234E   | DNA segment on chromosome 4 (unique) 234 expressed sequence                      |
| PKIB      | protein kinase (cAMP-dependent, catalytic) inhibitor beta                        |
| DACH1     | dachshund homolog 1 (Drosophila)                                                 |

---
