# Supplementary material
Source: PubMed Central journal article supplement (PMC2728979)
Supplement: 0901259106_ST4_PDF.pdf [file 0901259106_ST4_PDF.pdf]

**Table S4. Plasmids and oligonucleotides**

| Plasmids                       | Strain <sup>1</sup> | Cloning sites                   | Primer Forward (5'→3')                                                                                          | Primer Reverse (5'→3')                                                                 |
|--------------------------------|---------------------|---------------------------------|-----------------------------------------------------------------------------------------------------------------|----------------------------------------------------------------------------------------|
| pcV5-CFP                       | BUG2388             | Topo cloning <sup>2</sup>       | caccatggtgagcaag                                                                                                | gatatcctgtacagctcgtcc                                                                  |
| pcV5-BAHD1                     | BUG2289             | Topo cloning <sup>2</sup>       | caccatgacacacactcggagaaagtcc                                                                                    | ctgggggttcttaaggatgcgccc                                                               |
| pE-YFP-BAHD1                   | BUG2391             | <i>XhoI-EcoRI</i>               | ccgctcgagatgacacacactcggagaaagtcc                                                                               | cggaaatcgcctgggggttcttaaggatgcgcc                                                      |
| pB27-BAHD1                     | BUG2394             | <i>SpeI-PacI</i>                | gacgactagtgatgacacacactcggagaaag                                                                                | gcccttaattaagctgggggttcttaaggatg                                                       |
| pET41-GST-BAH                  | BUG2399             | <i>EcoRI-XhoI</i>               | cggaaatcactaatggctgggtacctgtt                                                                                   | ccgctcgagctgggggttcttaaggatgcgcc<br>cc                                                 |
| pGEX-GST-MBD1                  | BUG2292             | <i>BglII-EcoRI</i> <sup>3</sup> | agatctgctgaggactggctggactgcccg                                                                                  | gaattctacagtctgtagaacctccagtc                                                          |
| pGEX-GST-HP1 $\alpha$          | BUG2291             | <i>BamHI-EcoRI</i>              | ggatccccatgggaaagaaaaccaagcggac<br>agctg                                                                        | cttcgaattcccgggatctctcagttttgtg<br>gagcacagtataagcaca                                  |
| pGAL-BAHD1                     | BUG2506             | <i>EcoRI-NdeI</i>               | cggaaatcagatgacacacactcggagaaagtcc                                                                              | ggaattccatagctgggggttcttaaggatgc<br>gcc                                                |
| pGAL-HP1 $\alpha$ <sup>3</sup> | BUG2658             | <i>BglII-BglII</i>              | acgtagatctgtatggcttaccatacagattcca<br>gattacgctagctgggtggtcatatggccatgg<br>gaaagaaaaccaagcgg                    | agatctgaatctctcagttttgtggagcaca<br>gtgataagcacattttttggatgttttaggag<br>agaaaggggtggtag |
| pGAL-MBD1 <sup>3</sup>         | BUG2416             | <i>EcoRI-XhoI</i>               | gccggaattcagcttaccatacagattccag<br>attacgctagcttgggtcatatggccatggctgag<br>gactggctgg                            | taatacgactcactatagggcctcgag                                                            |
| <b>Cloning strategy</b>        |                     |                                 |                                                                                                                 |                                                                                        |
| pE-YFP-BAHD1-<br>$\Delta$ BAH  | BUG2740             | <i>KpnI</i>                     | Deletion of a <i>KpnI-KpnI</i> fragment in pE-YFP-BAHD1 leading to production of BAHD1- $\Delta$ BAH (aa 1-592) |                                                                                        |

1) *E. coli* strains

2) Directional topo cloning (Invitrogen)

3) Constructs were also HA-tagged.
