# Supplementary material
Source: PubMed Central journal article supplement (PMC2728979)
Supplement: 0901259106_ST5_PDF.pdf [file 0901259106_ST5_PDF.pdf]

**Table S5. List of siRNA and of primers used in qRT-PCR and qPCR (ChIP)**

| siRNA              |                                              |              |                           |                                                                                                                |                                                                                                                                            |
|--------------------|----------------------------------------------|--------------|---------------------------|----------------------------------------------------------------------------------------------------------------|--------------------------------------------------------------------------------------------------------------------------------------------|
| Gene symbol        | Gene title                                   | Acc. Numb.   | Application               | Name of RNA                                                                                                    | Sequences of RNA                                                                                                                           |
| BAHD1              | bromo adjacent homology domain containing 1  | NM_014952    | siRNA                     | BAHD1#1 sense<br>BAHD1#1 antisense<br>BAHD1#2 sense<br>BAHD1#2 antisense<br>BAHD1#3 sense<br>BAHD1#3 antisense | ggucaaugccaagaacuauu<br>auaguucuuugcuaugaccct<br>ggcugccugaugaaccuatt<br>augguucaucagggcagcct<br>ggacuugcauuuucaguuu<br>aacugaaaugcaagucct |
| qRTPCR assays      |                                              |              |                           |                                                                                                                |                                                                                                                                            |
| Gene symbol        | Gene title                                   | Acc. Numb.   | Application               | Name of primers                                                                                                | Sequences of primers                                                                                                                       |
| 18S                | 18S rRNA gene                                | X03205       | SYBRgreen<br>Taqman assay | HSP_18S_PP1_fw<br>HSP_18S_PP1_rv<br>Hs99999901 s1                                                              | ACCGCGTTCATTTTGTG<br>CCCTCTTAATCATGGCCTCA                                                                                                  |
| GAPDH              | glyceraldehyde 3-phosphate dehydrogenase     | NM_002046    | SYBRgreen<br>Taqman assay | HSP_GAPDH_5_fw<br>HSP_GAPDH_5_rv<br>Hs99999905 m1                                                              | GCCATCAATGACCCCTTCATT<br>TTGACGGTGCCATGGAATTT                                                                                              |
| HPRT               | hypoxanthine phosphoribosyltransferase       | NM_000194    | SYBRgreen                 | HSP_HPRT_PP2_fw<br>HSP_HPRT_PP2_rv                                                                             | CACTGGCAAAACAATGCAGA<br>AACACTTCGTGGGGCTCTT                                                                                                |
| BAHD1              | bromo adjacent homology domain containing 1  | NM_014952    | SYBRgreen                 | HSP_BAHD_FP2_fw<br>HSP_BAHD_FP2_rv                                                                             | CTGACTCGCCTGGAGAATG<br>GTCAGGCGGTAGCTCATCA                                                                                                 |
| IGF2               | insulin-like growth factor 2 (somatomedin A) | X07868       | SYBRgreen                 | HSP_IGF2_A1_fw<br>HSP_IGF2_A1_rv                                                                               | AGTCGTGGCTCCTCATCTTG<br>CAGGCACAGGTGACATTCAG                                                                                               |
| IGF2AS             | insulin-like growth factor 2, antisense      | NP_057496    | SYBRgreen                 | HSP_IGF2AS_sp2_fw<br>HSP_IGF2AS_sp2_rev                                                                        | GCTGAAGCTCTGGCTCTGA<br>GGAGCTGGTTTGTAAATGC                                                                                                 |
| ALOX5              | arachidonate 5-lipoxygenase                  | NM_000698    | SYBRgreen                 | HSP_ALOX5_A3_fw<br>HSP_ALOX5_A3_rv                                                                             | AGCGCAACAAGAAGAAGCA<br>ACTGGCAGTGTGCTCAGATG                                                                                                |
| ANX                | annexin A1                                   | NM_000700    | SYBRgreen                 | HSP_ANX_B1_fw<br>HSP_ANX_B1_rv                                                                                 | AAAGTGGTCCCGGATCAG<br>TTATGCAAGGCAGCCGACATC                                                                                                |
| CA3                | collagen, type III, alpha 1                  | A1813758     | SYBRgreen                 | HSP_CA3_B1_fw<br>HSP_CA3_B1_rv                                                                                 | AACACGCAAGGCTGTGAGACT<br>GCCAACGTCCACACCAAATT                                                                                              |
| F2R                | coagulation factor II (thrombin) receptor    | NM_001992    | SYBRgreen                 | HSP_F2R_A1_fw<br>HSP_F2R_A1_rv                                                                                 | TTCTCACATTCCACCACAGA<br>GGCACTCAGAGGAAGCGTAA                                                                                               |
| LAMP2              | Lysosomal-associated membrane protein 2      | NM_013995    | SYBRgreen                 | HSP_LAMP2_sp2_fw<br>HSP_LAMP2_sp2_rv                                                                           | TGTGGTCGGTGGTCATCA<br>GGTACAACAACAGCTGCAACA                                                                                                |
| PLAU               | plasminogen activator, urokinase             | NM_002658.2  | SYBRgreen                 | HSP_PLAU_A2_fw<br>HSP_PLAU_A2_rv                                                                               | GACAAGCCAGGCGTCTACA<br>CCATTCTCTCTTGGTGTGA                                                                                                 |
| SCARA3             | scavenger receptor class A, member 3         | NM_016240.2  | SYBRgreen                 | HSP_SCARA3_A2_fw<br>HSP_SCARA3_A2_rv                                                                           | CGGACTGGCAGAACTACACA<br>GTGGCCTGGATGTTCTTGAC                                                                                               |
| SESN3              | sestrin 3                                    | NM_144665.2  | SYBRgreen                 | HSP_SESN3_A1_fw<br>HSP_SESN3_A1_rv                                                                             | GGTATTGCTGAGTGGTTGAATG<br>ATCAGCCAAGGTCGATGTG                                                                                              |
| BVES               | blood vessel epicardial substance            | NM_147147    | Taqman assay              | Hs00362584_m1                                                                                                  |                                                                                                                                            |
| CPLX1              | complexin 1                                  | NM_000305    | Taqman assay              | Hs00362510_m1                                                                                                  |                                                                                                                                            |
| PON2               | paraoxonase 2                                | NM_000305    | Taqman assay              | Hs00165563_m1                                                                                                  |                                                                                                                                            |
| HBA1               | hemoglobin, alpha 1                          | NM_000558    | Taqman assay              | Hs00361191_g1                                                                                                  |                                                                                                                                            |
| qPCR (ChIP) assays |                                              |              |                           |                                                                                                                |                                                                                                                                            |
| Gene symbol        | Gene title                                   | Acc. Numb.   | Application               | Name of primers                                                                                                | Sequences of primers                                                                                                                       |
| IGF2               | insulin-like growth factor 2 (somatomedin A) | X07868       | SYBRgreen                 | IGF2_CpG1_fw<br>IGF2_CpG1_rv                                                                                   | TGGAAGAATGTTGAGGGCAGGG<br>AGGCCAGAAACAATAGTGGGAGGA                                                                                         |
|                    |                                              |              | SYBRgreen                 | IGF2_DMR0_fw<br>IGF2_DMR0_rv                                                                                   | ACTTTAAGTGTTCAGGCGTGGGTG<br>TTTGTGCAGCCCTAAAGGAGAACC                                                                                       |
|                    |                                              |              | SYBRgreen                 | IGF2_P3-a_fw<br>IGF2_P3-a_rv                                                                                   | TTGGGTTTCTTCTTACCCCGGA<br>TTCTTTGCCTTCTCCACACGGA                                                                                           |
|                    |                                              |              | SYBRgreen                 | IGF2_P3-b_fw<br>IGF2_P3-b_rv                                                                                   | AAATTTGGGCATTGTCCCGGCTC<br>TGTGTTTGGCAACGCTAGAGAGA                                                                                         |
|                    |                                              |              | SYBRgreen                 | IGF2_P3-c_fw<br>IGF2_P3-c_rv                                                                                   | AACTCGCTCTATGCAAGTCCAAC<br>GCGGGAACACAGCTCAAATCCTA                                                                                         |
|                    |                                              |              | SYBRgreen                 | IGF2_Int5-6_fw<br>IGF2_Int5-6_rv                                                                               | ACCTCGGCATTATGACCTGTGTGT<br>CAAGAAGTGAGAAGCACCAGCAT                                                                                        |
|                    |                                              |              | SYBRgreen                 | IGF2_DMR2_fw<br>IGF2_DMR2_rv                                                                                   | ACGGACGTTTCCATCAGGTTCCT<br>TTGAAGATGCTGCTGTCTTCTCT                                                                                         |
|                    |                                              |              | H19                       | H19, imprinted maternally expressed untranslated mRNA                                                          | NR_002196                                                                                                                                  |
| CD44               | CD44 molecule                                | NM_001001389 | SYBRgreen                 | CD44_CpG_fw<br>CD44_CpG_rv                                                                                     | TATTTACAGCCTCAGCAGACGCG<br>AAACAGTGACCTAAGACGGAGGGA                                                                                        |
